# Supplementary material for: A theoretical investigation of 38-atom CuPd clusters: the effect of potential parameterisation on structure and segregation
Source: Royal Society of Chemistry journal article supplement (doi:10.1039/d1cp00810b), 2021-01-01
Supplement: d1cp00810b3.pdf [file d1cp00810b3.pdf]

## A theoretical investigation of 38-atom CuPd clusters: the effect of potential parameterisation on structure and segregation - Supplementary Information

Caitlin A. Casey-Stevens, Mingrui Yang, Geoffrey R. Weal,  
Samantha M. McIntyre, Brianna K. Nally, and Anna L. Garden

### 1 Radial distribution functions of all GM clusters from GPSs C, M and P/N, and DFT refinement, for all bimetallic compositions ( $\text{Cu}_1\text{Pd}_{37}$ to $\text{Cu}_{37}\text{Pd}_1$ )

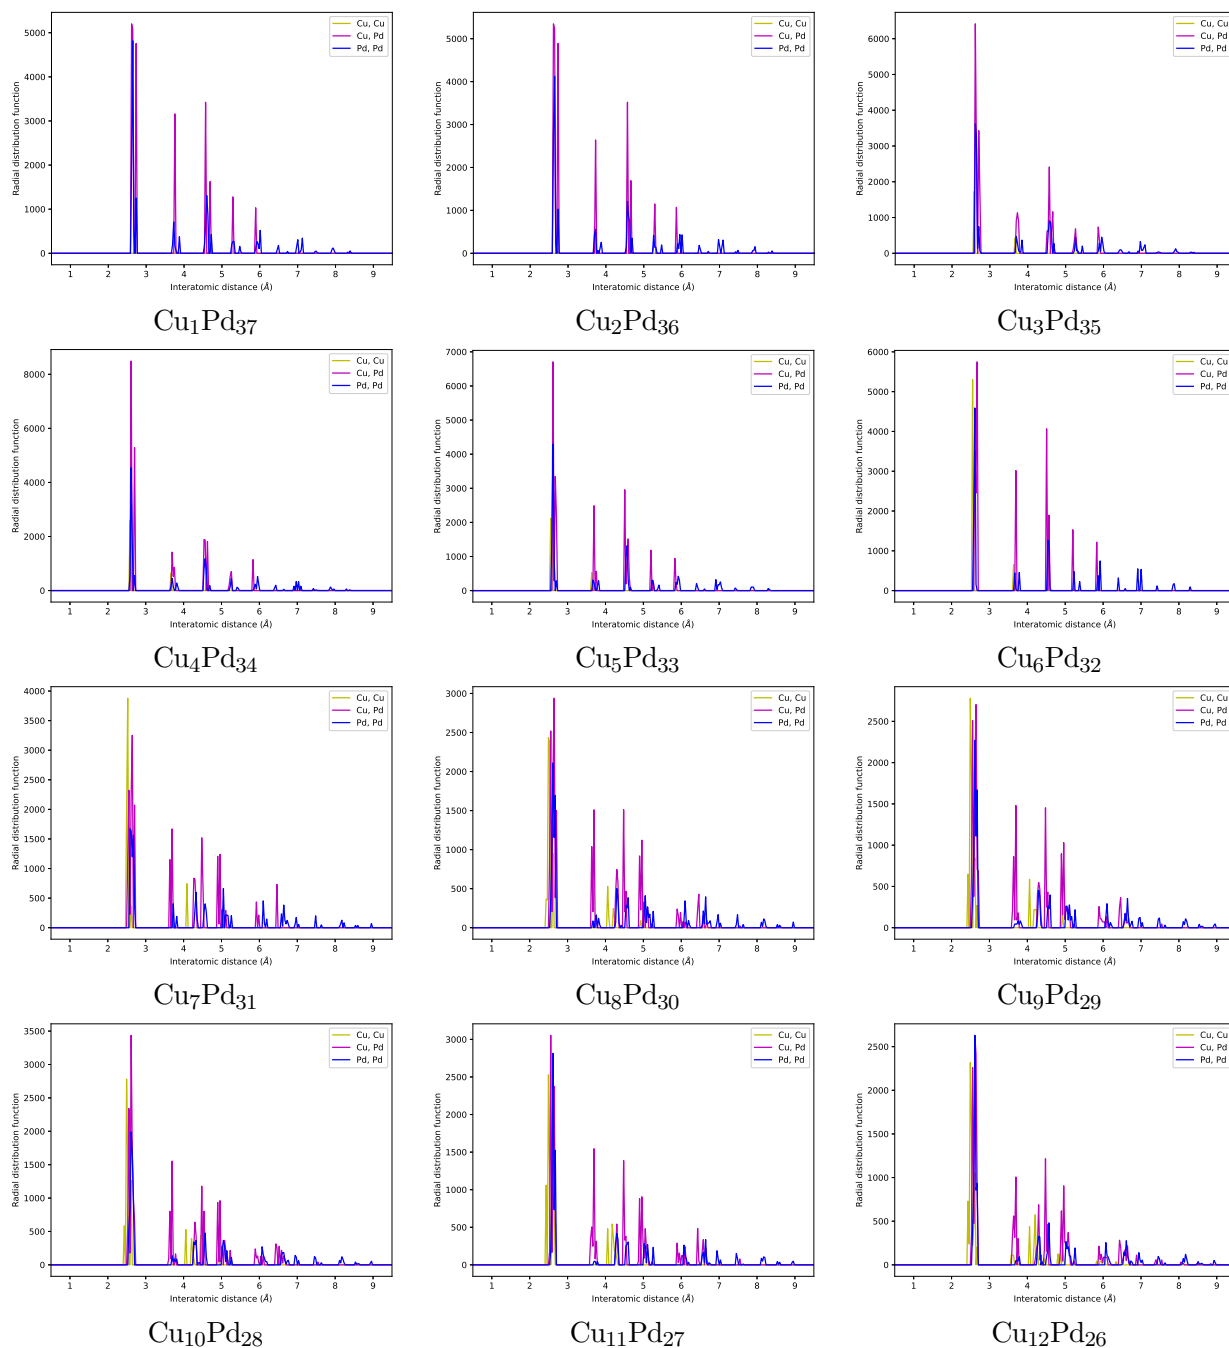

Figure 1: The radial distribution functions calculated for GM clusters of all compositions found in a global optimisation run with GPS C.

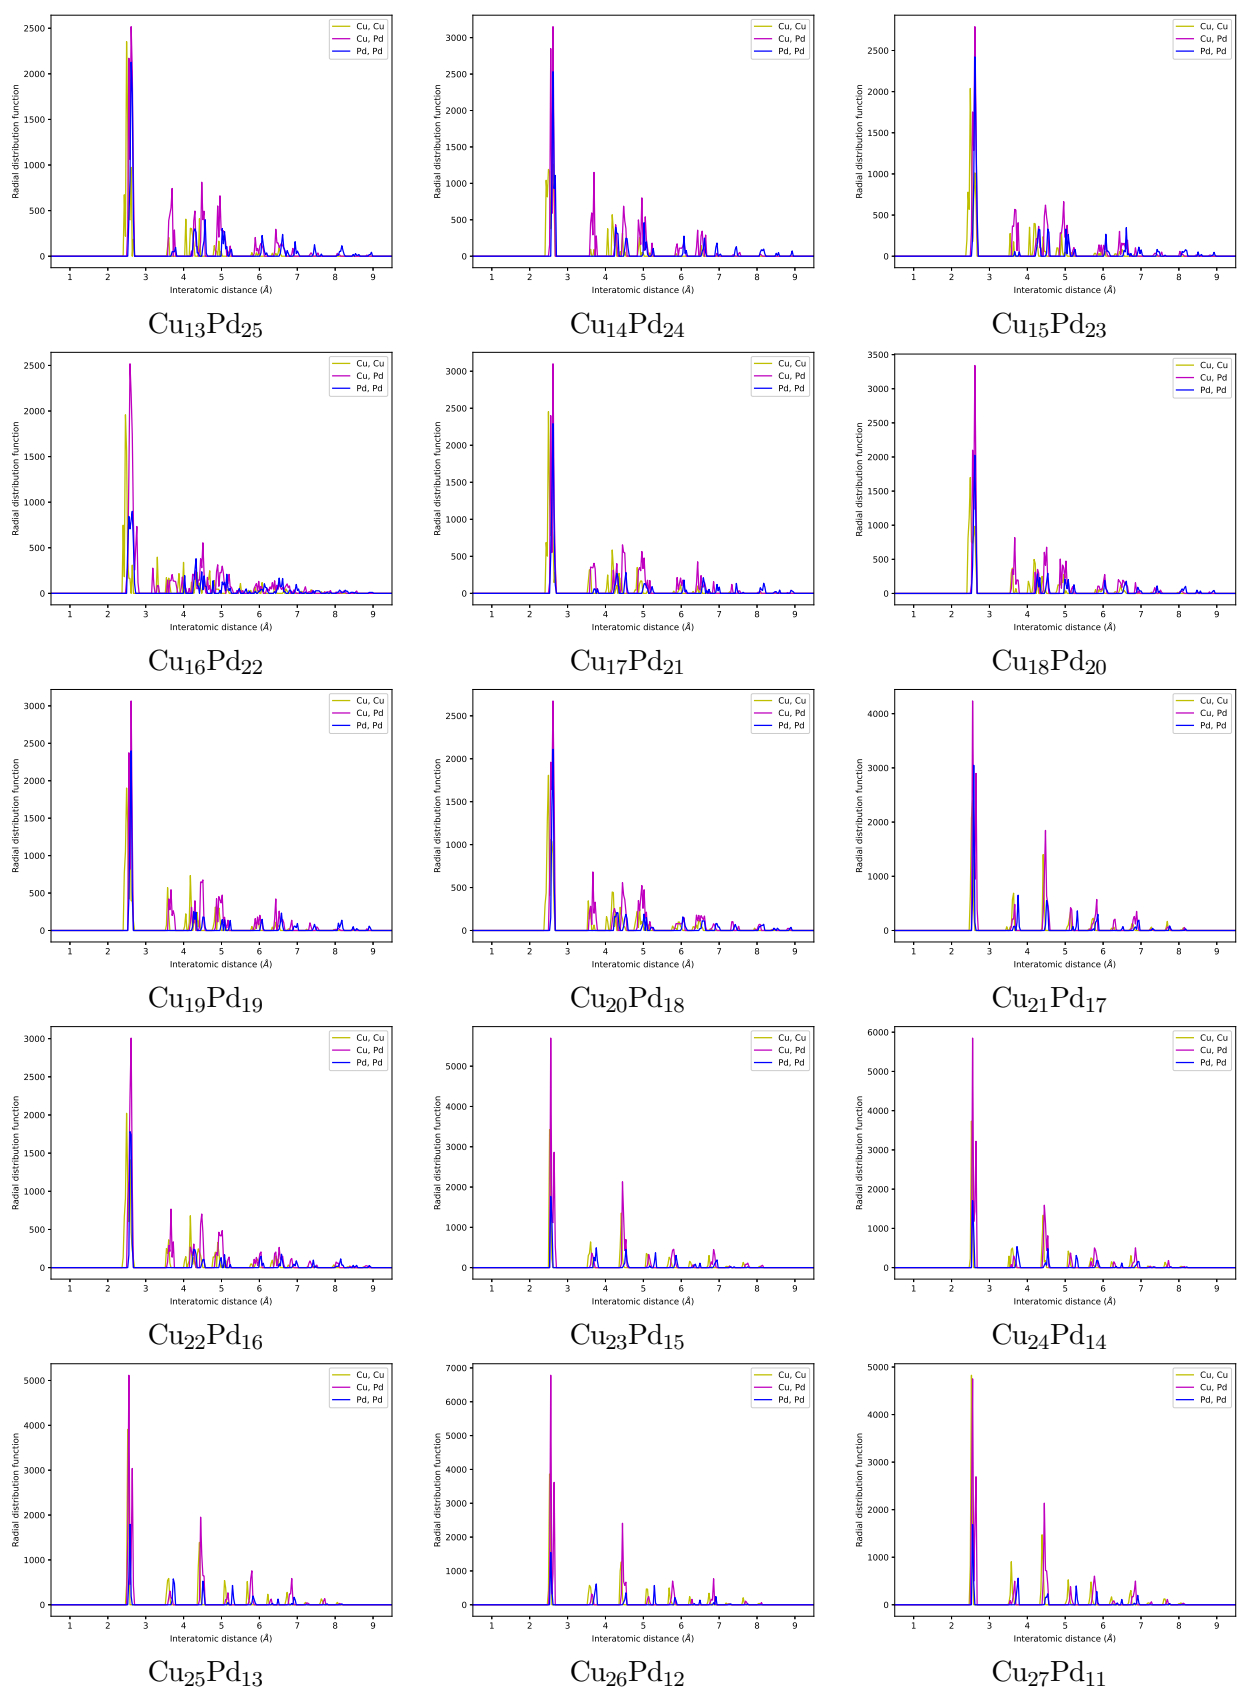

Figure 2: The radial distribution functions calculated for GM clusters of all compositions found in a global optimisation run with GPS C *cont'd*.

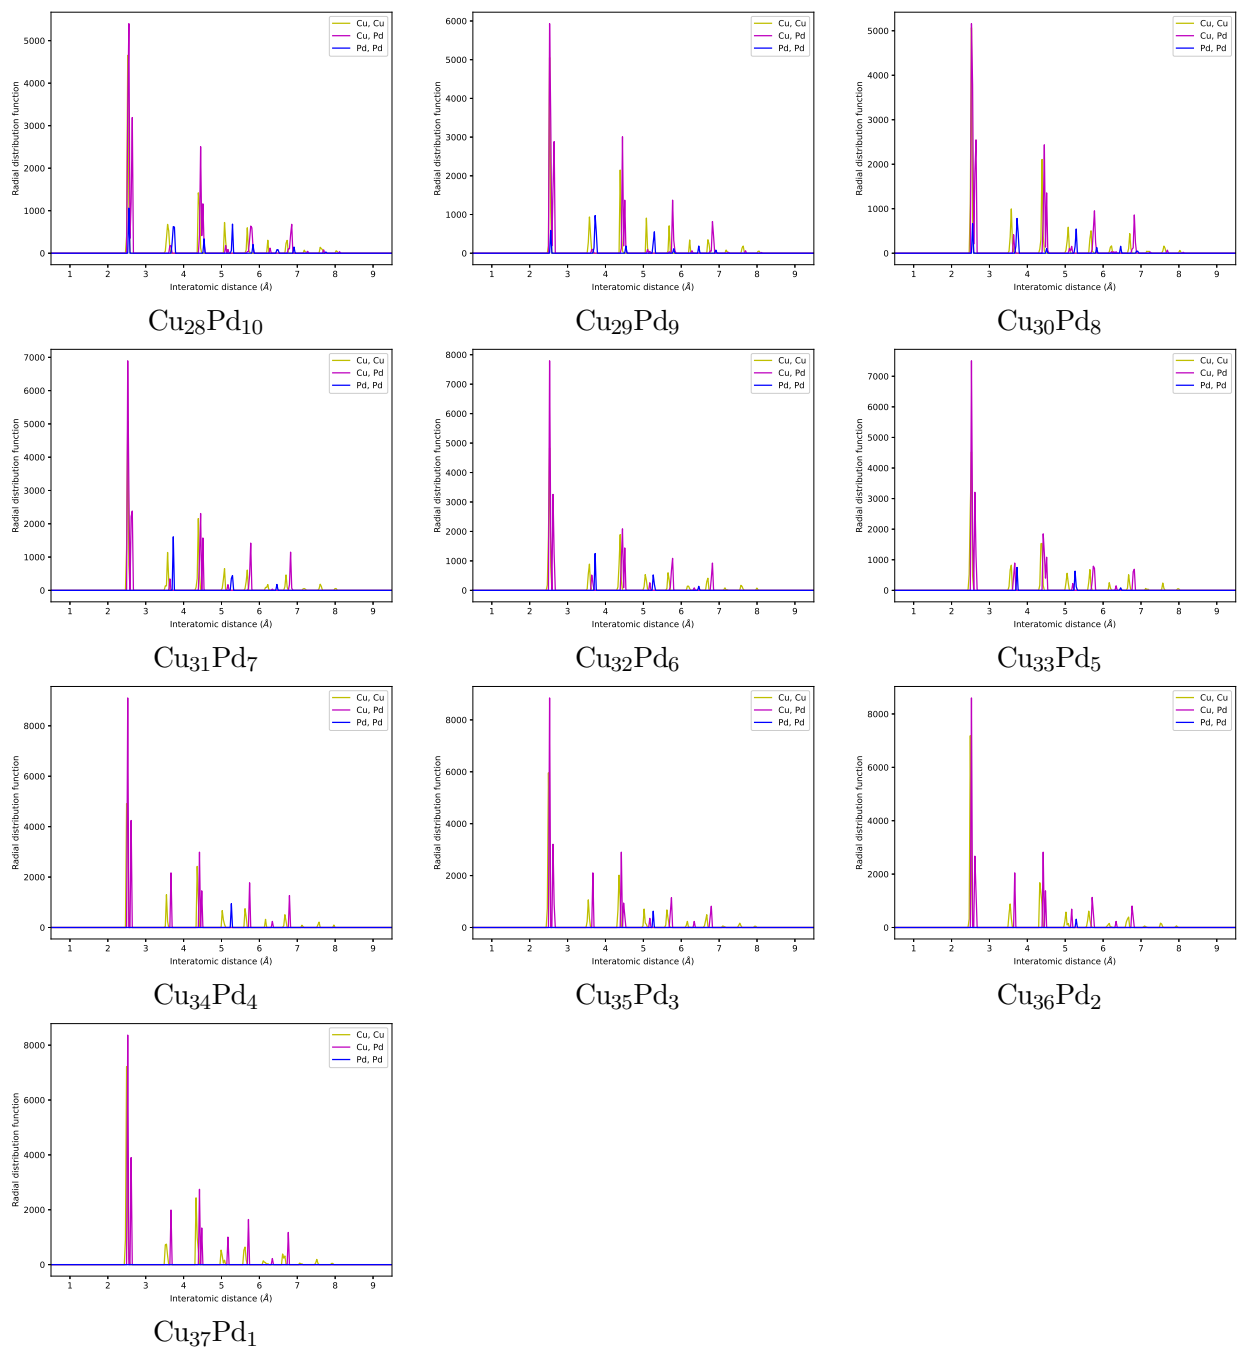

Figure 3: The radial distribution functions calculated for GM clusters of all compositions found in a global optimisation run with GPS *C cont'd*.

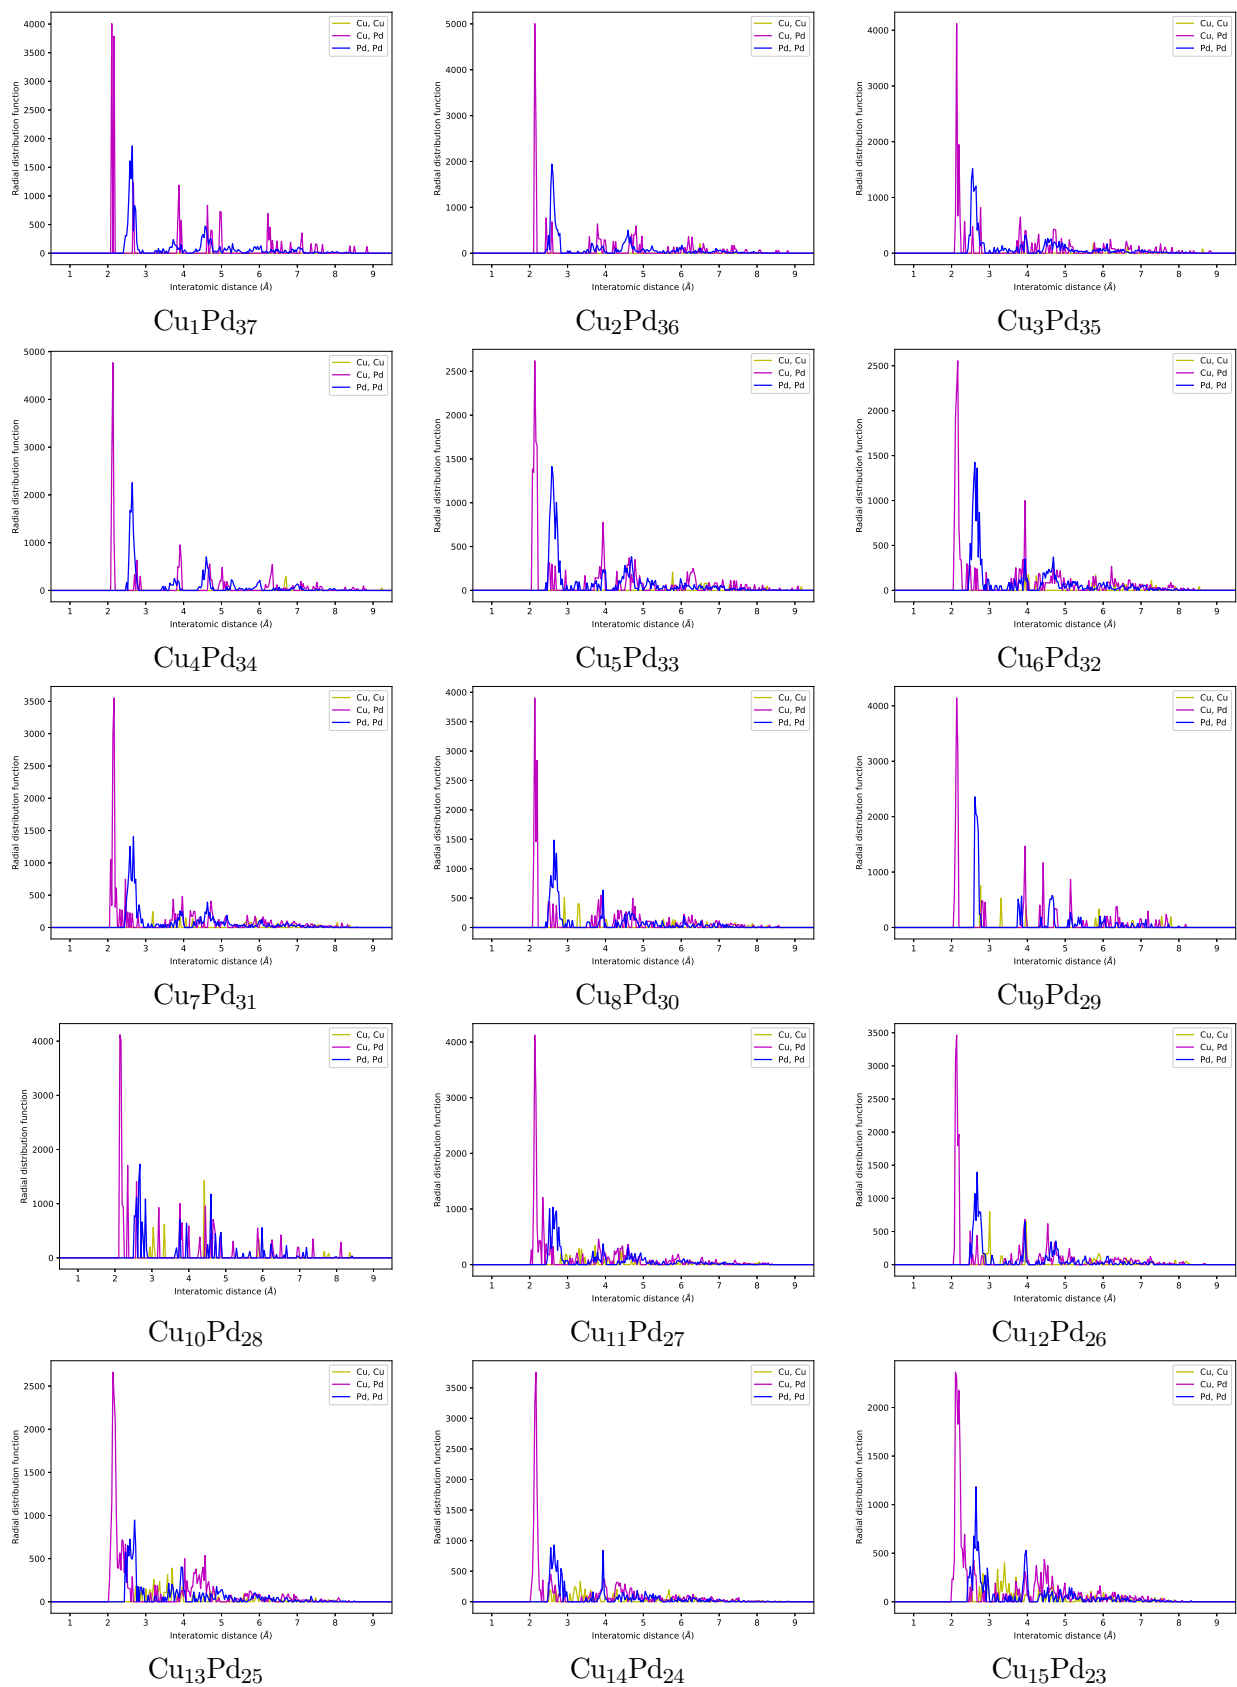

Figure 4: The radial distribution functions calculated for GM clusters of all compositions found in a global optimisation run with GPS M.

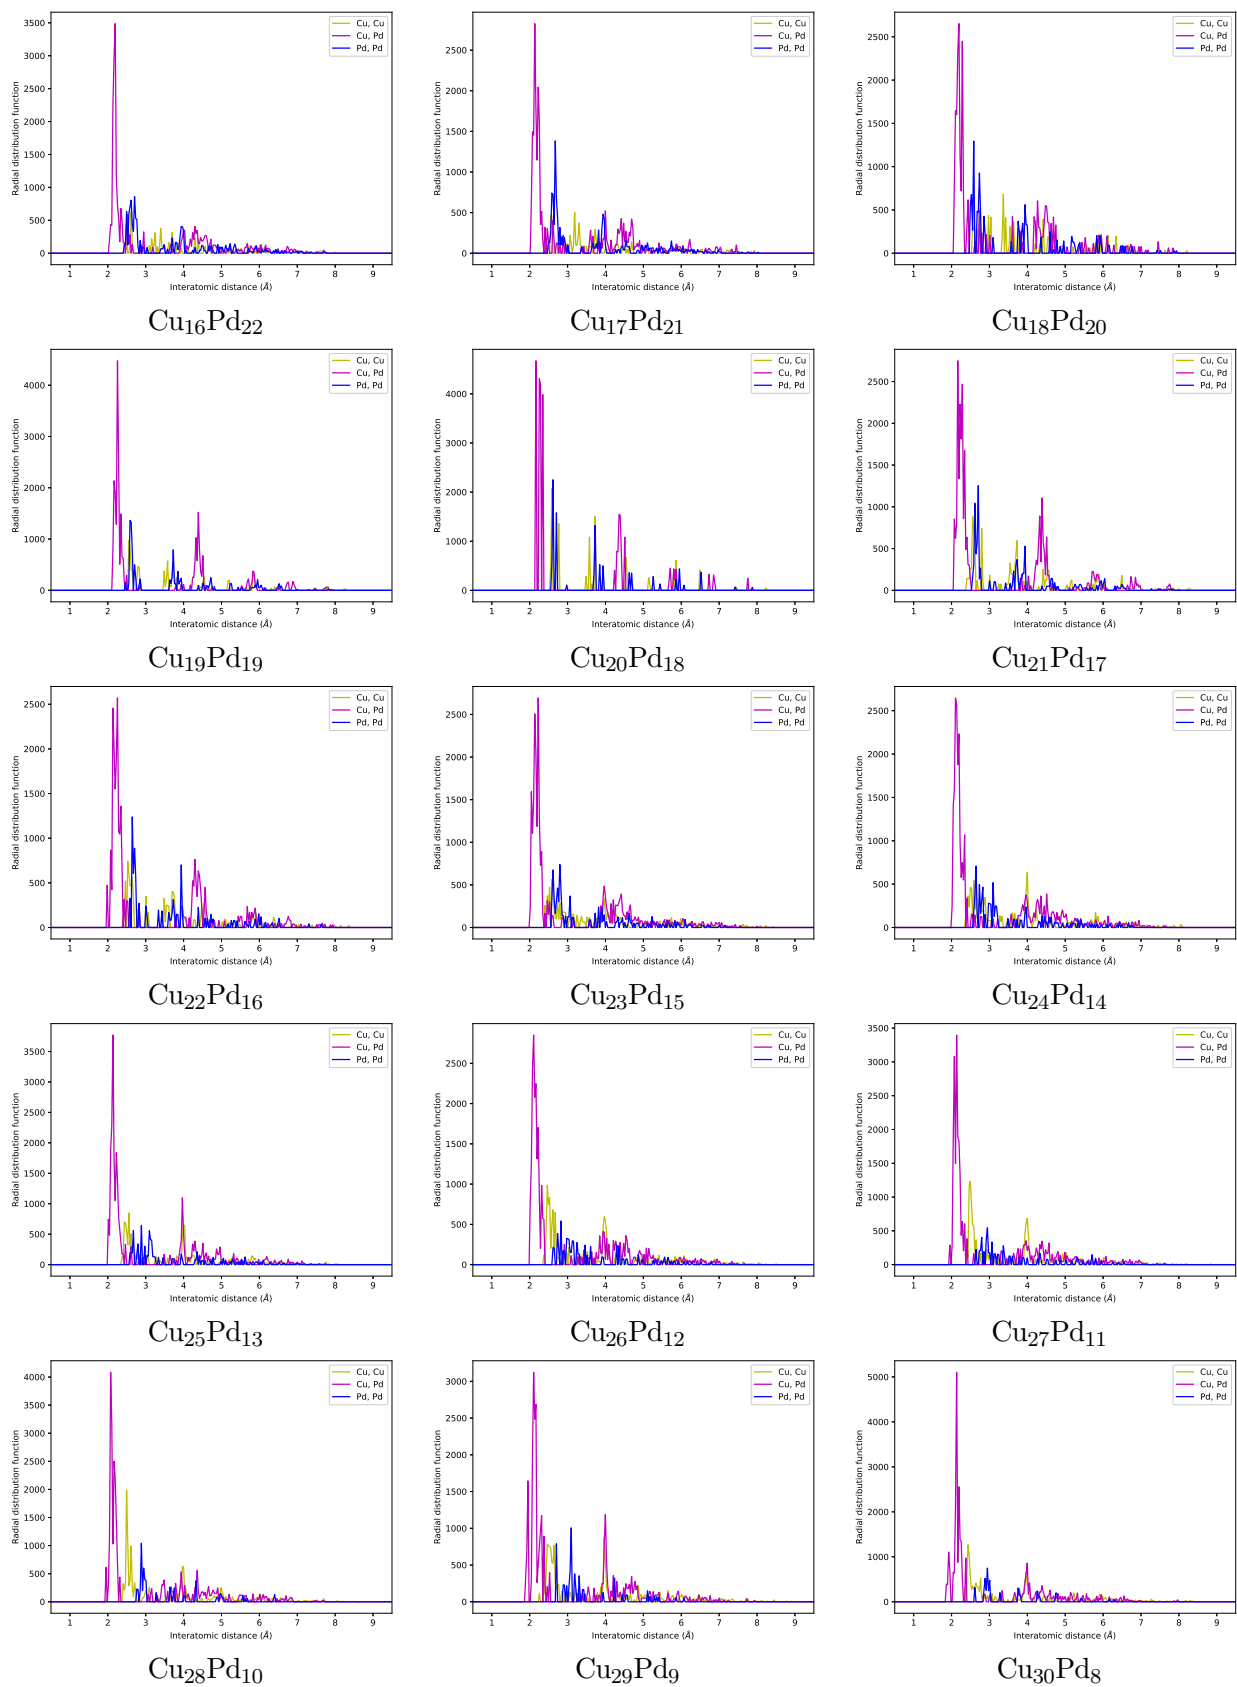

Figure 5: The radial distribution functions calculated for GM clusters of all compositions found in a global optimisation run with GPS *M cont'd*.

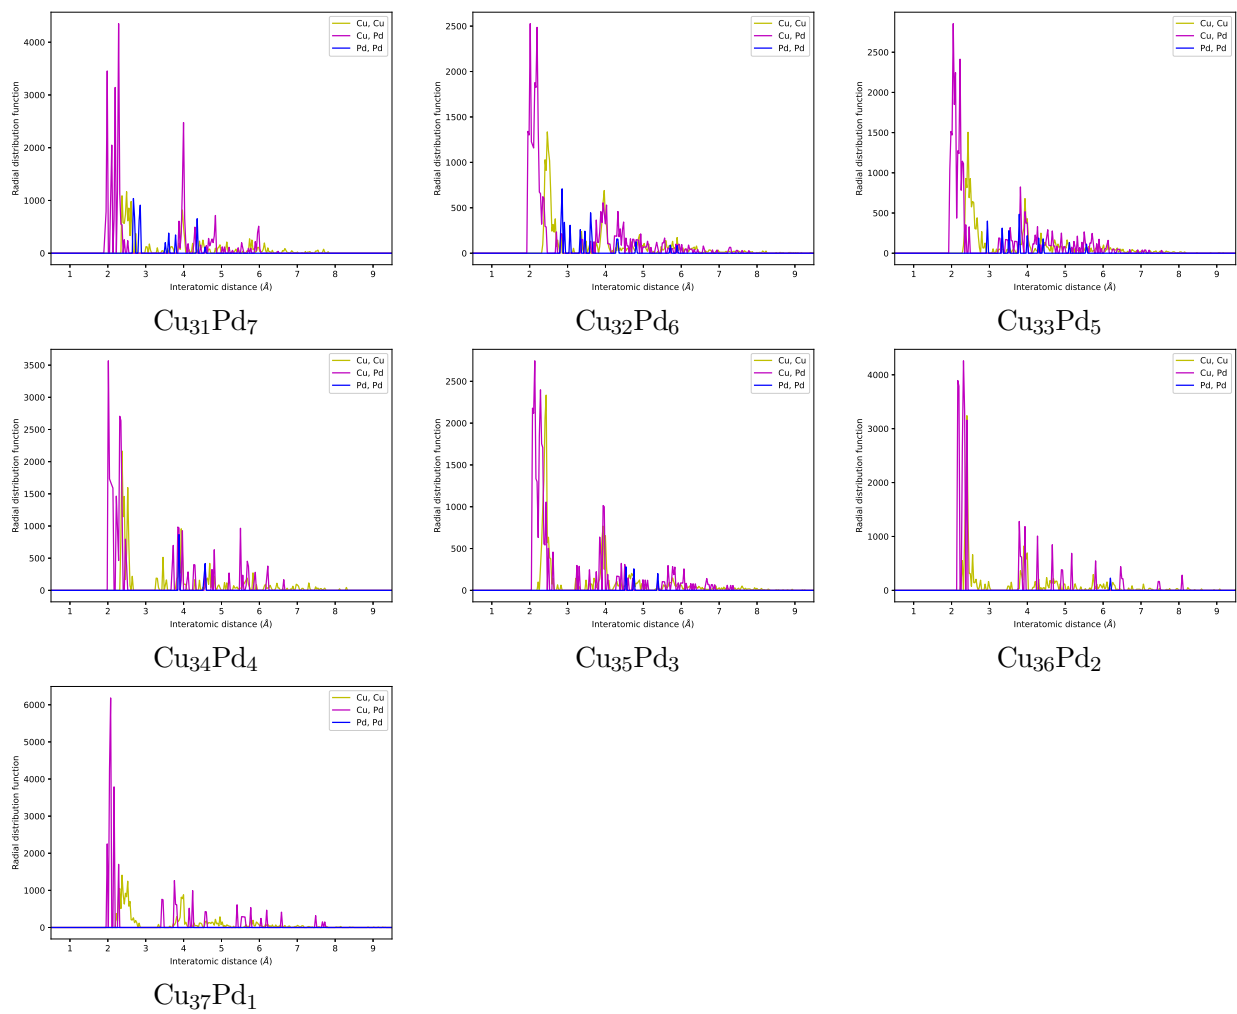

Figure 6: The radial distribution functions calculated for GM clusters of all compositions found in a global optimisation run with GPS *M cont'd*.

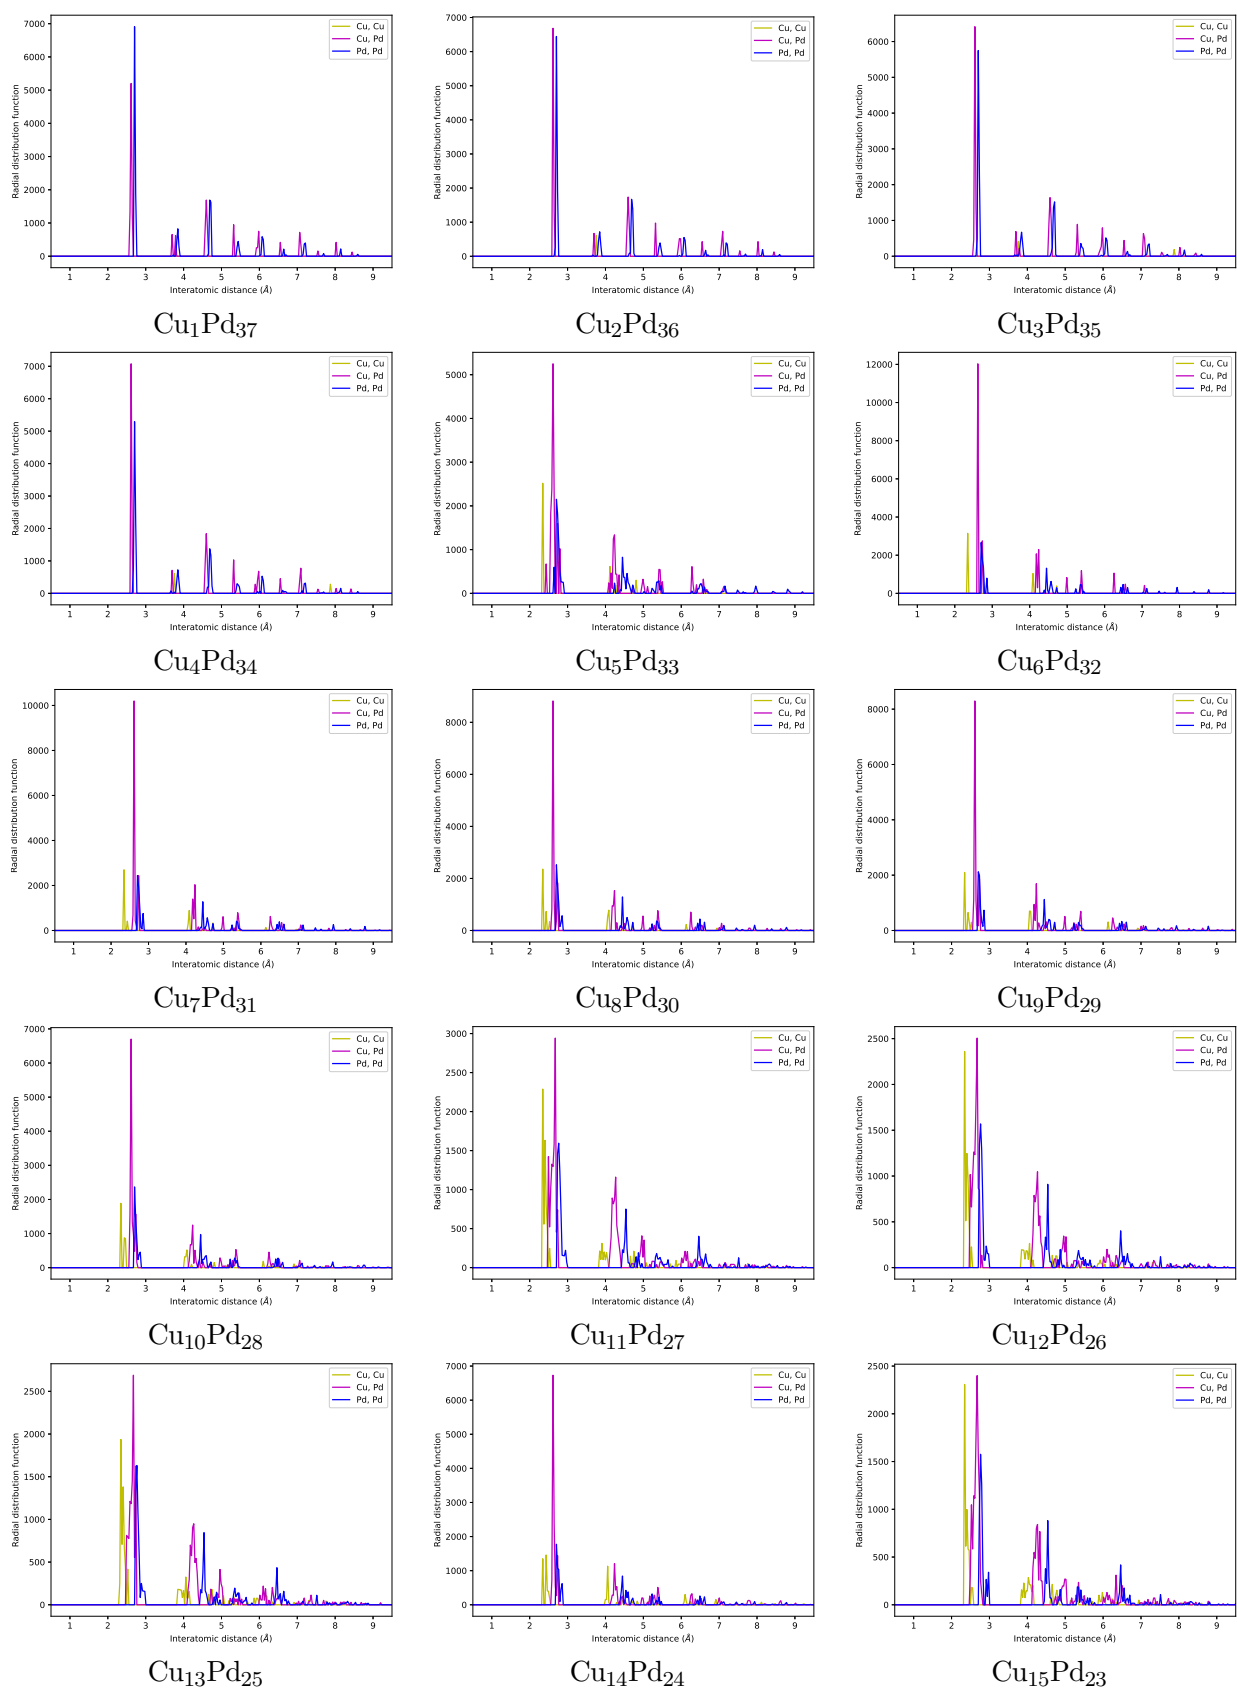

Figure 7: The radial distribution functions calculated for GM clusters of all compositions found in a global optimisation run with GPS P/N.

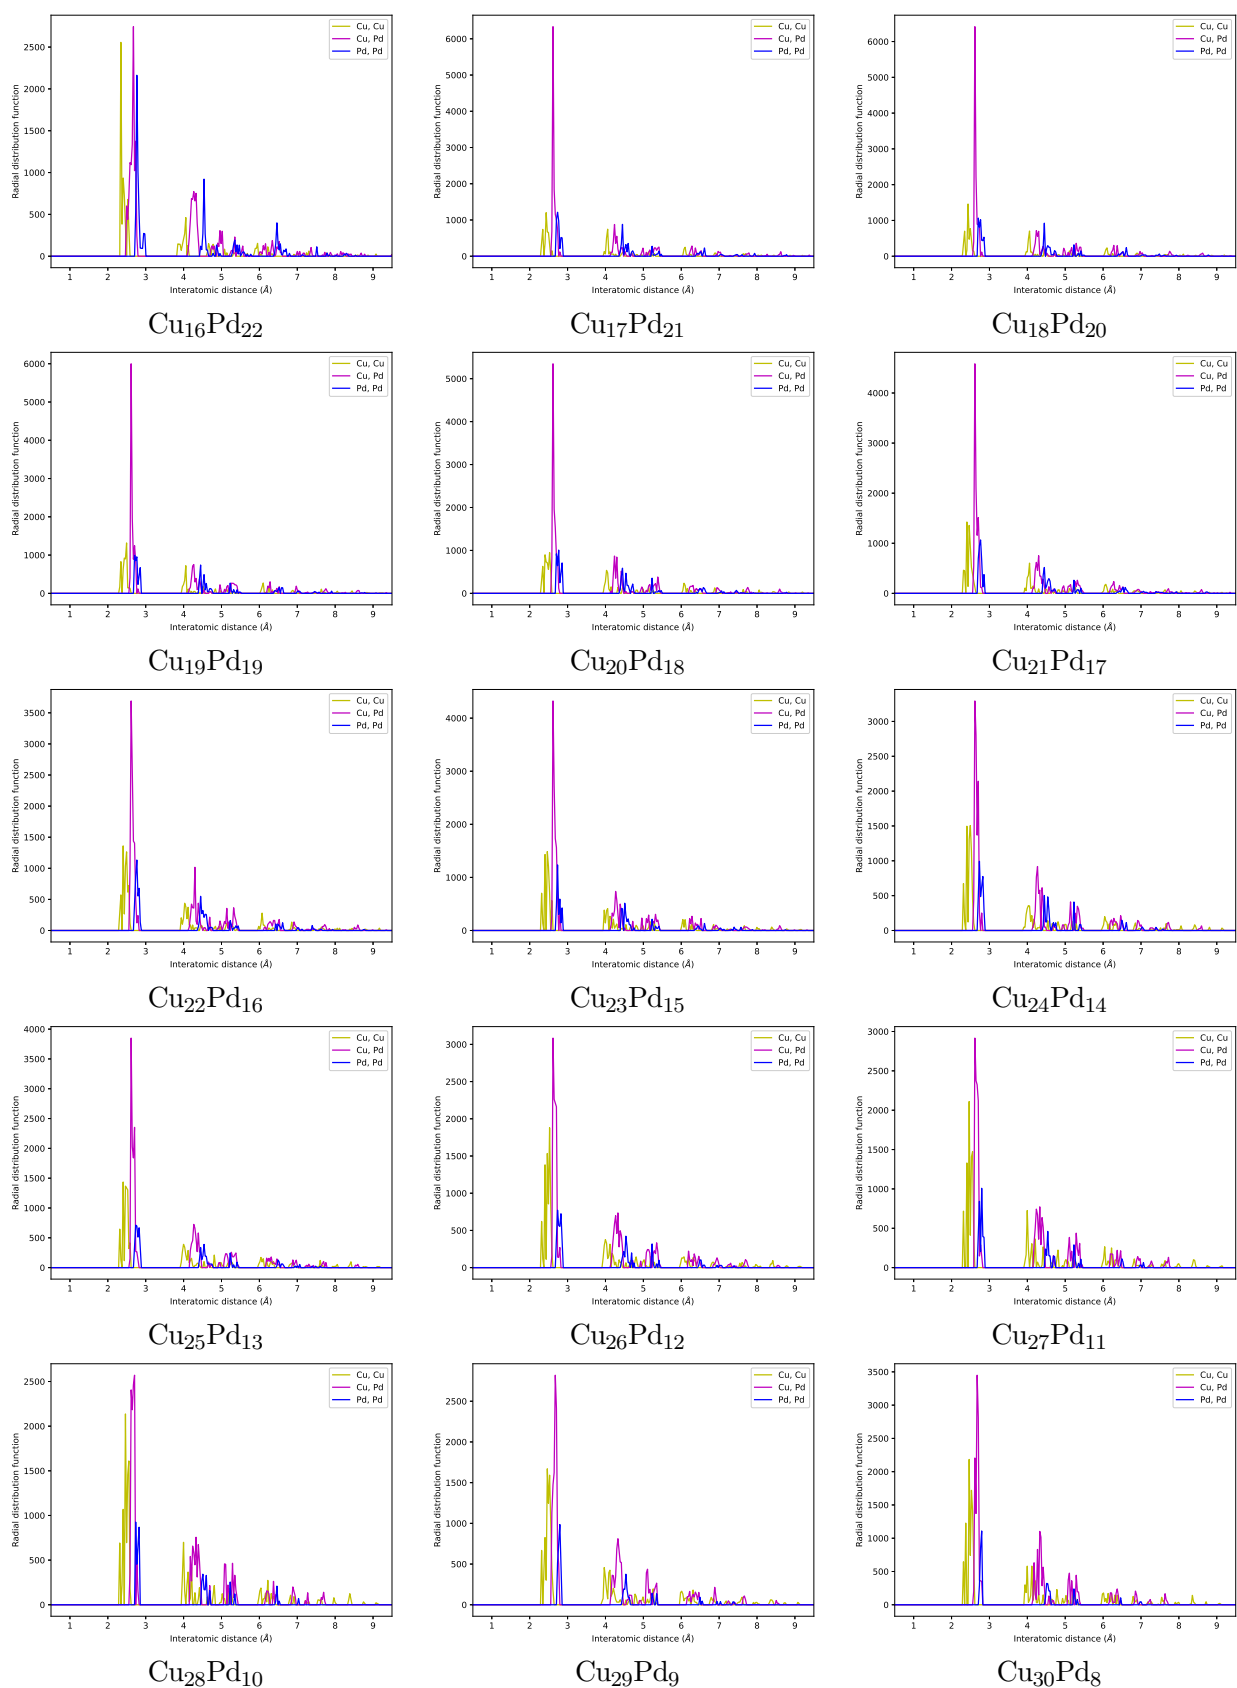

Figure 8: The radial distribution functions calculated for GM clusters of all compositions found in a global optimisation run with GPS P/N *cont'd*.



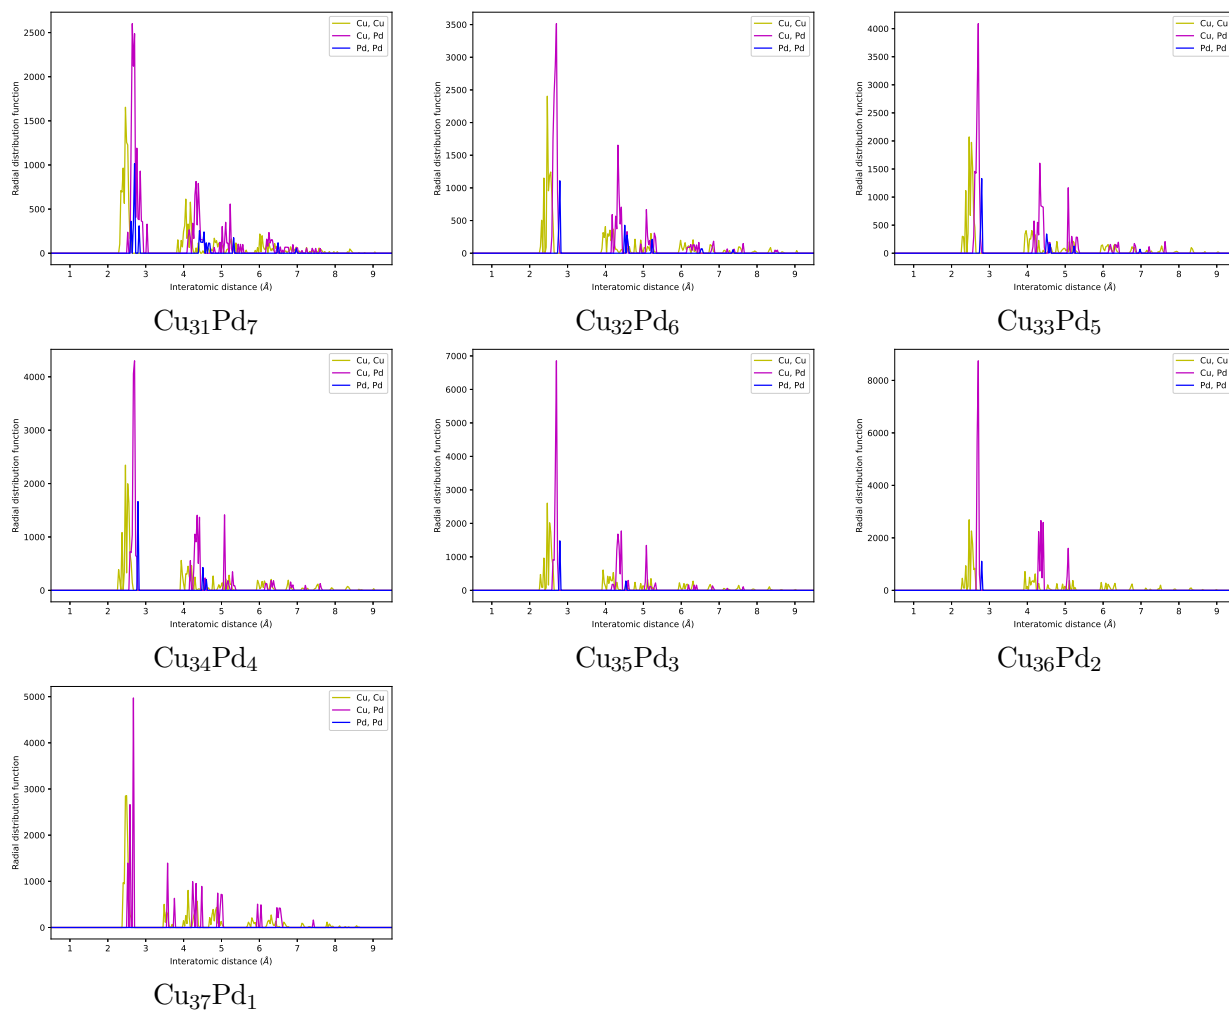

Figure 9: The radial distribution functions calculated for GM clusters of all compositions found in a global optimisation run with GPS P/N *cont'd*.

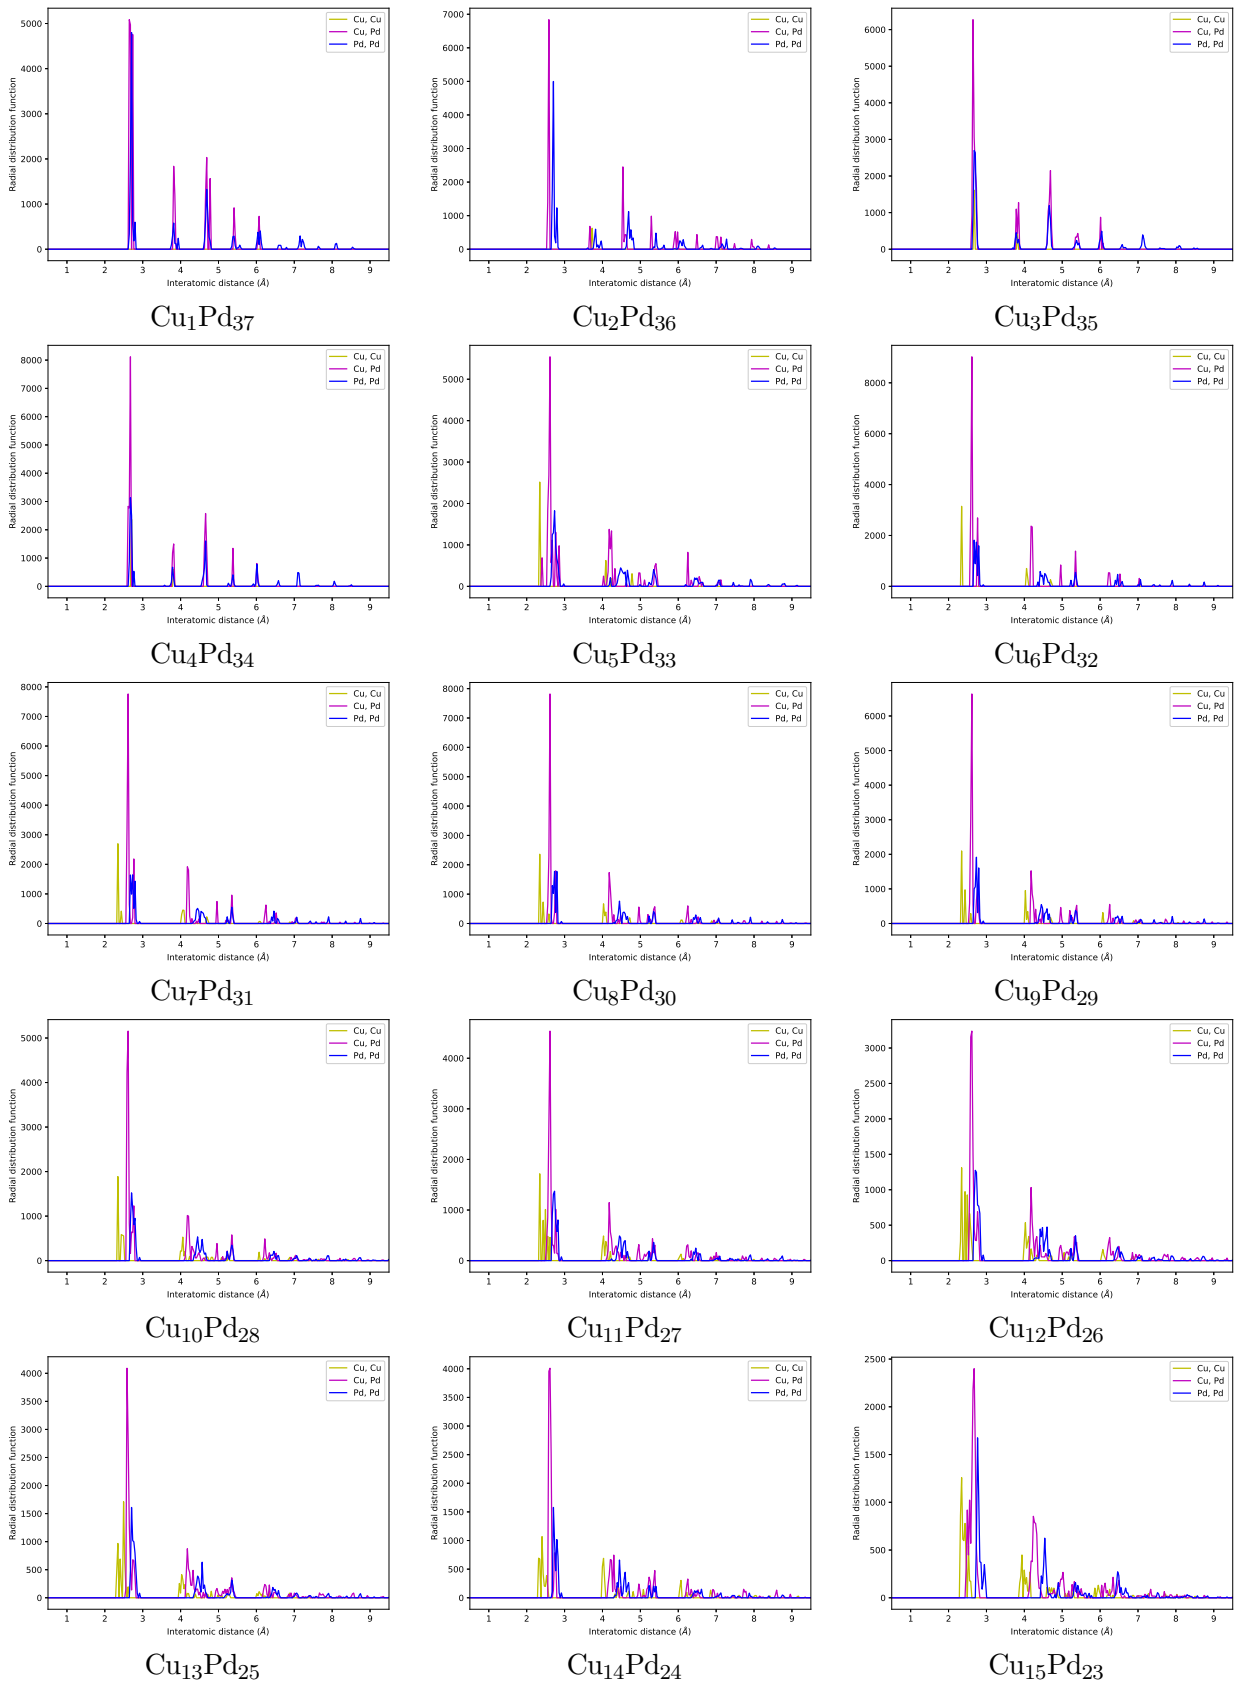

Figure 10: The radial distribution functions calculated for GM clusters of all compositions as found by DFT refinement of the GM clusters from the global optimisation runs of each GPS.

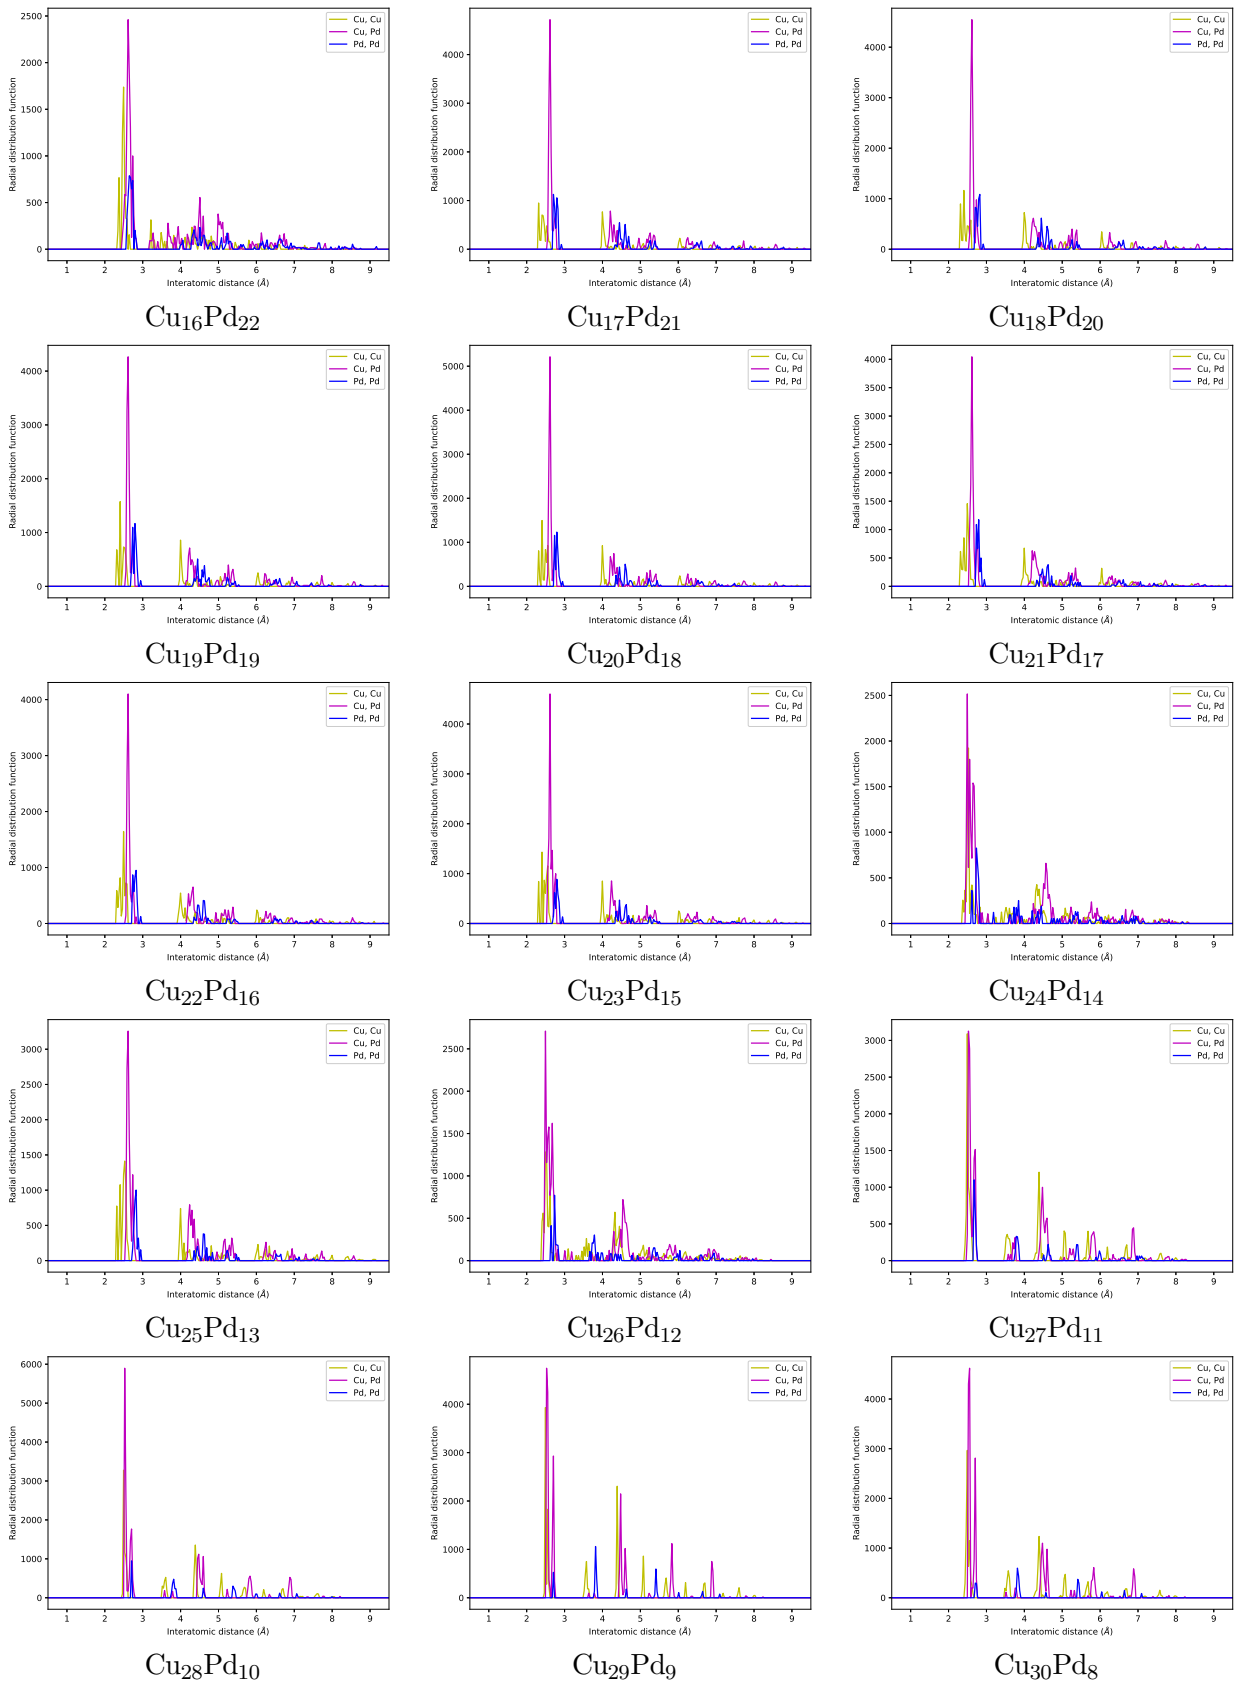

Figure 11: The radial distribution functions calculated for GM clusters of all compositions as found by DFT refinement of the GM clusters from the global optimisation runs of each GPS *cont'd*.

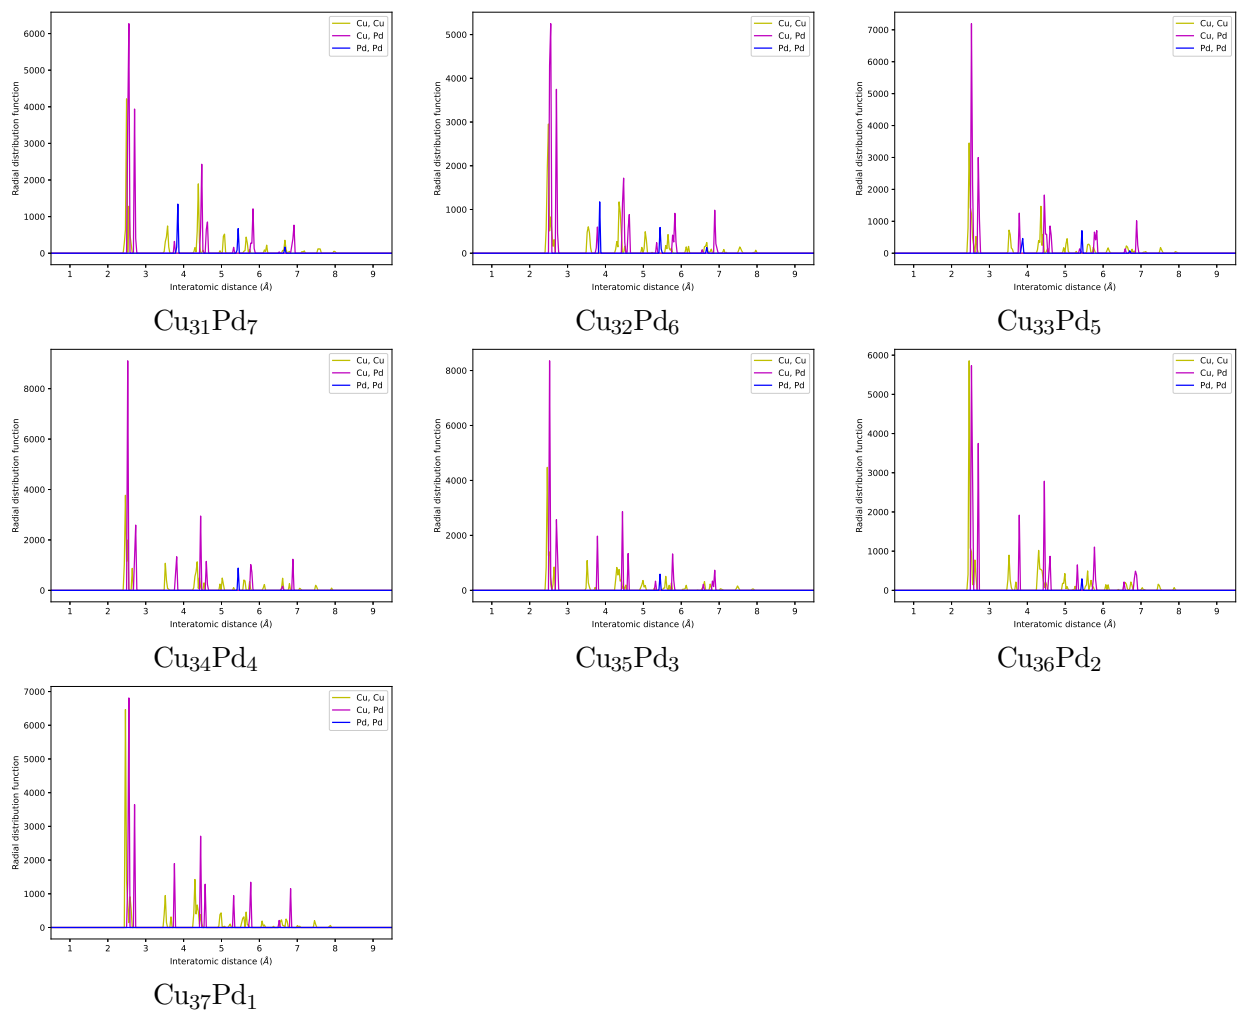

Figure 12: The radial distribution functions calculated for GM clusters of all compositions as found by DFT refinement of the GM clusters from the global optimisation runs of each GPS *cont'd*.

## 2 Nearest neighbour analyses of all GM clusters from GPSs C, M and P/N, and DFT refinement, for all bimetallic compositions ( $\text{Cu}_1\text{Pd}_{37}$ to $\text{Cu}_{37}\text{Pd}_1$ )

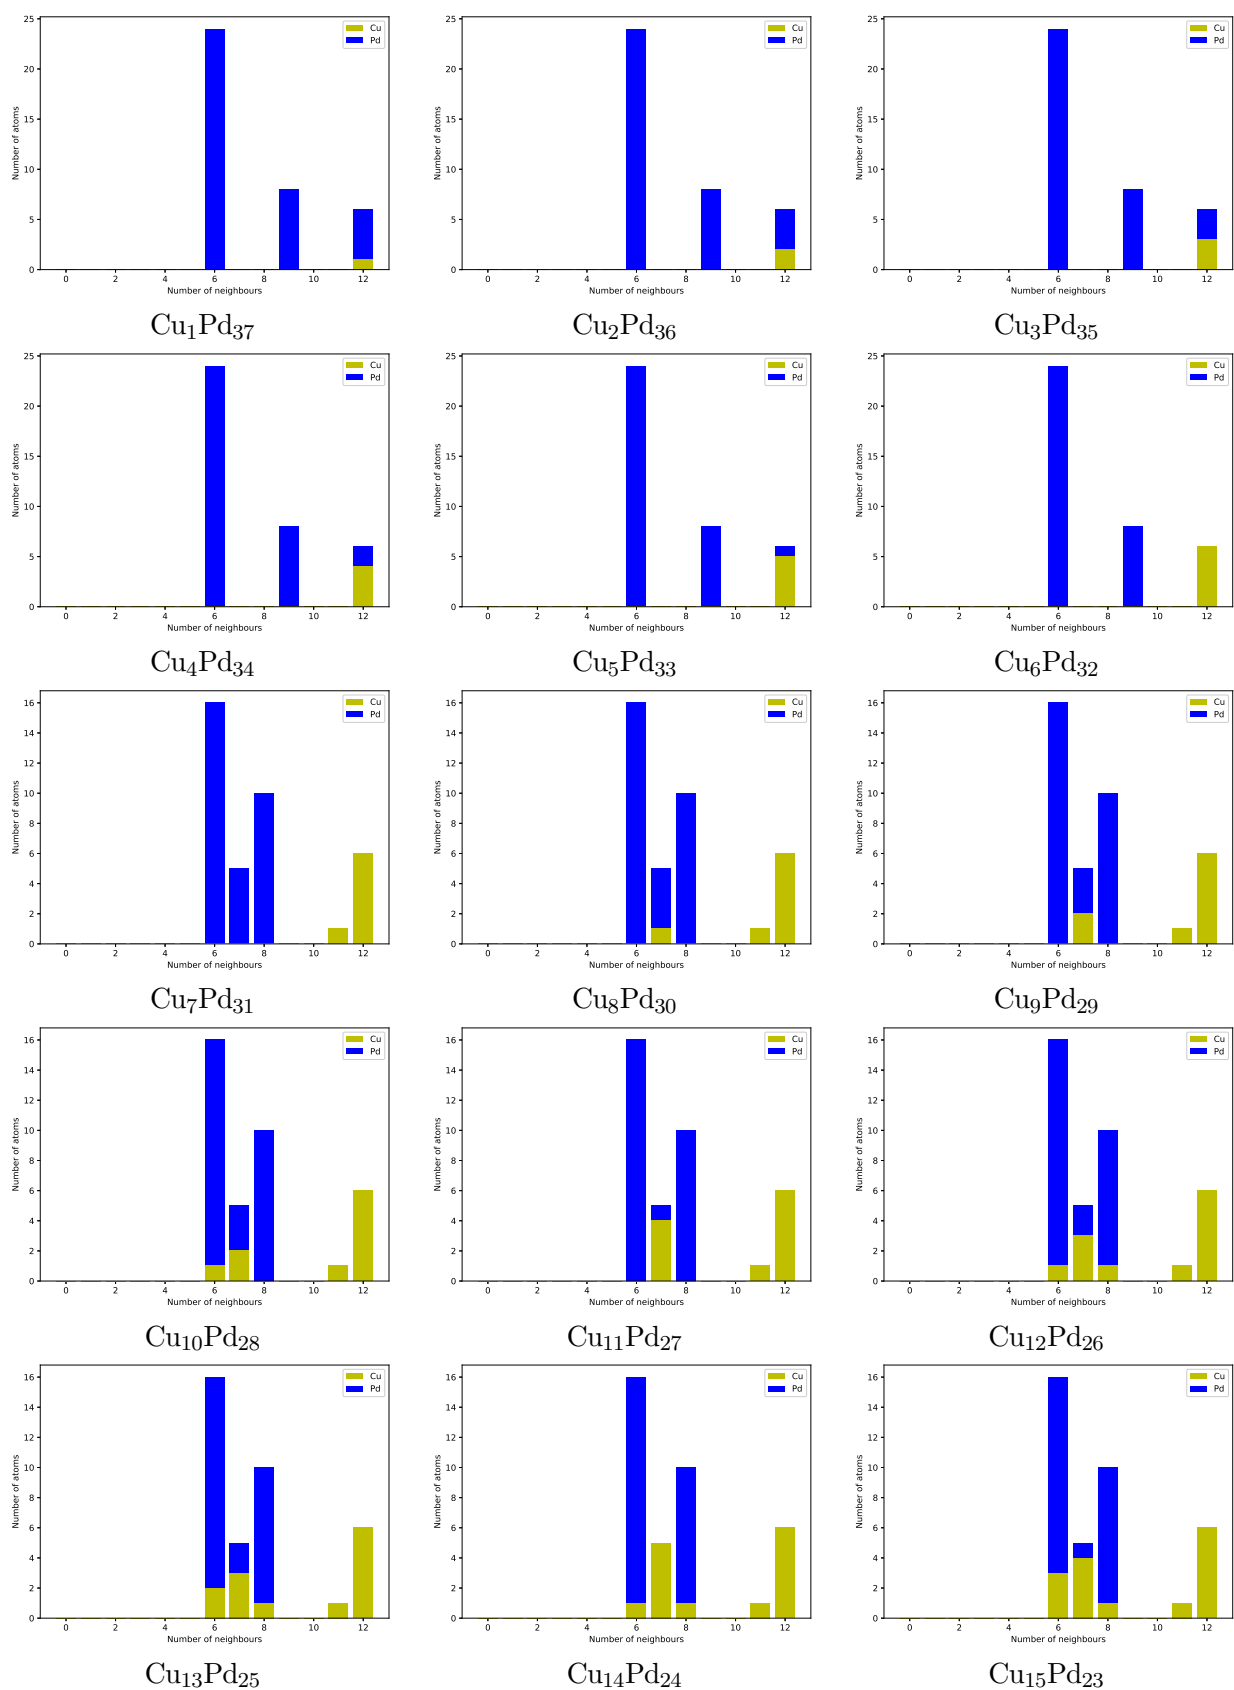

Figure 13: The nearest neighbour analyses calculated for GM clusters of all compositions found in a global optimisation run with GPS C.

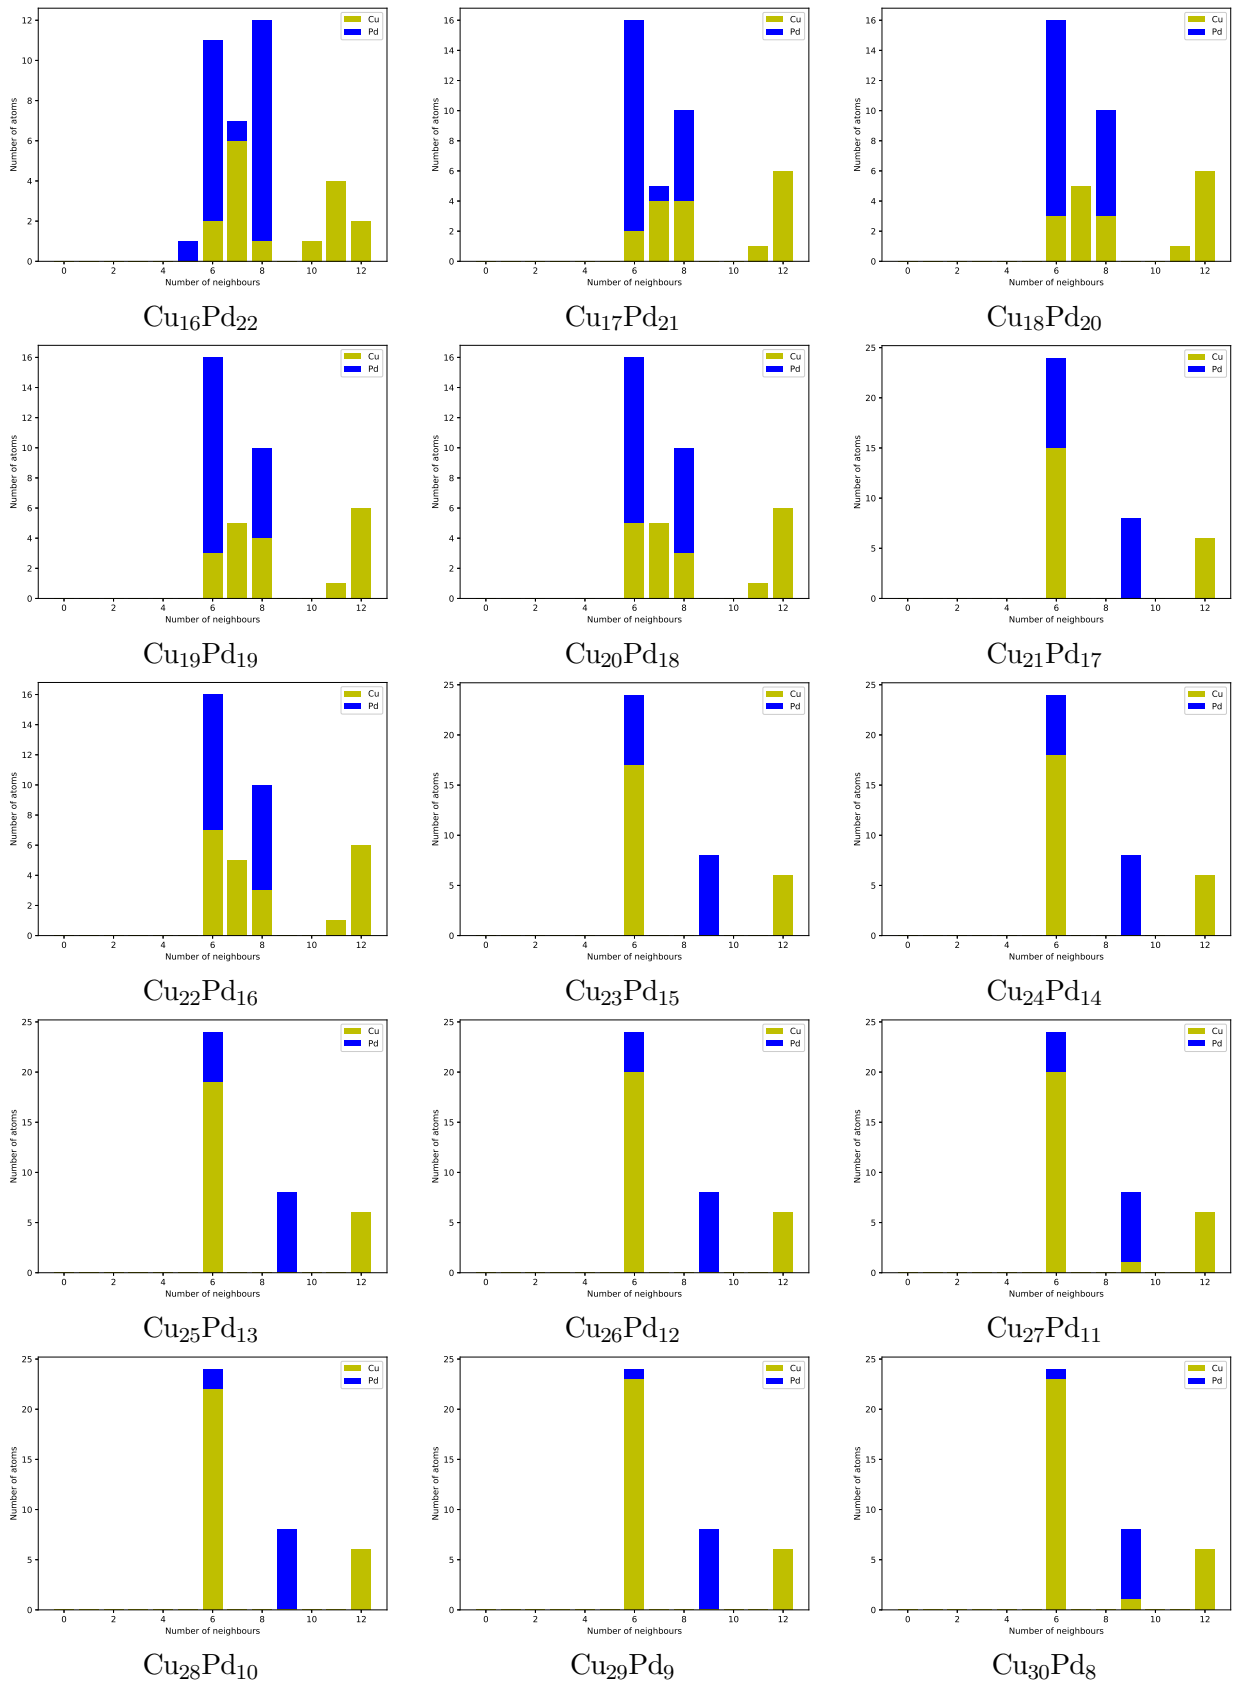

Figure 14: The nearest neighbour analyses calculated for GM clusters of all compositions found in a global optimisation run with GPS C *cont'd*.

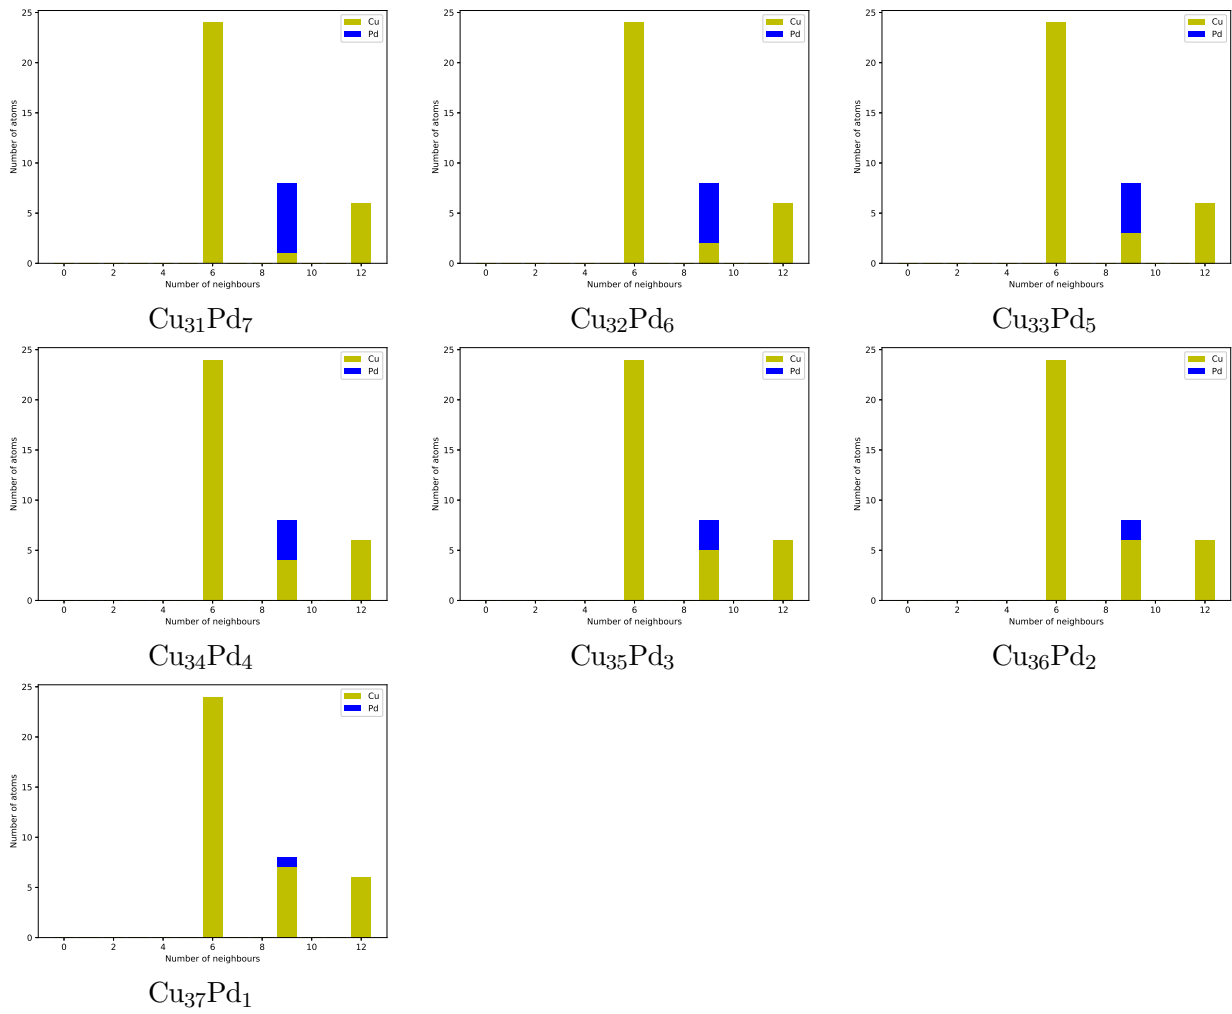

Figure 15: The nearest neighbour analyses calculated for GM clusters of all compositions found in a global optimisation run with GPS C *cont'd.*

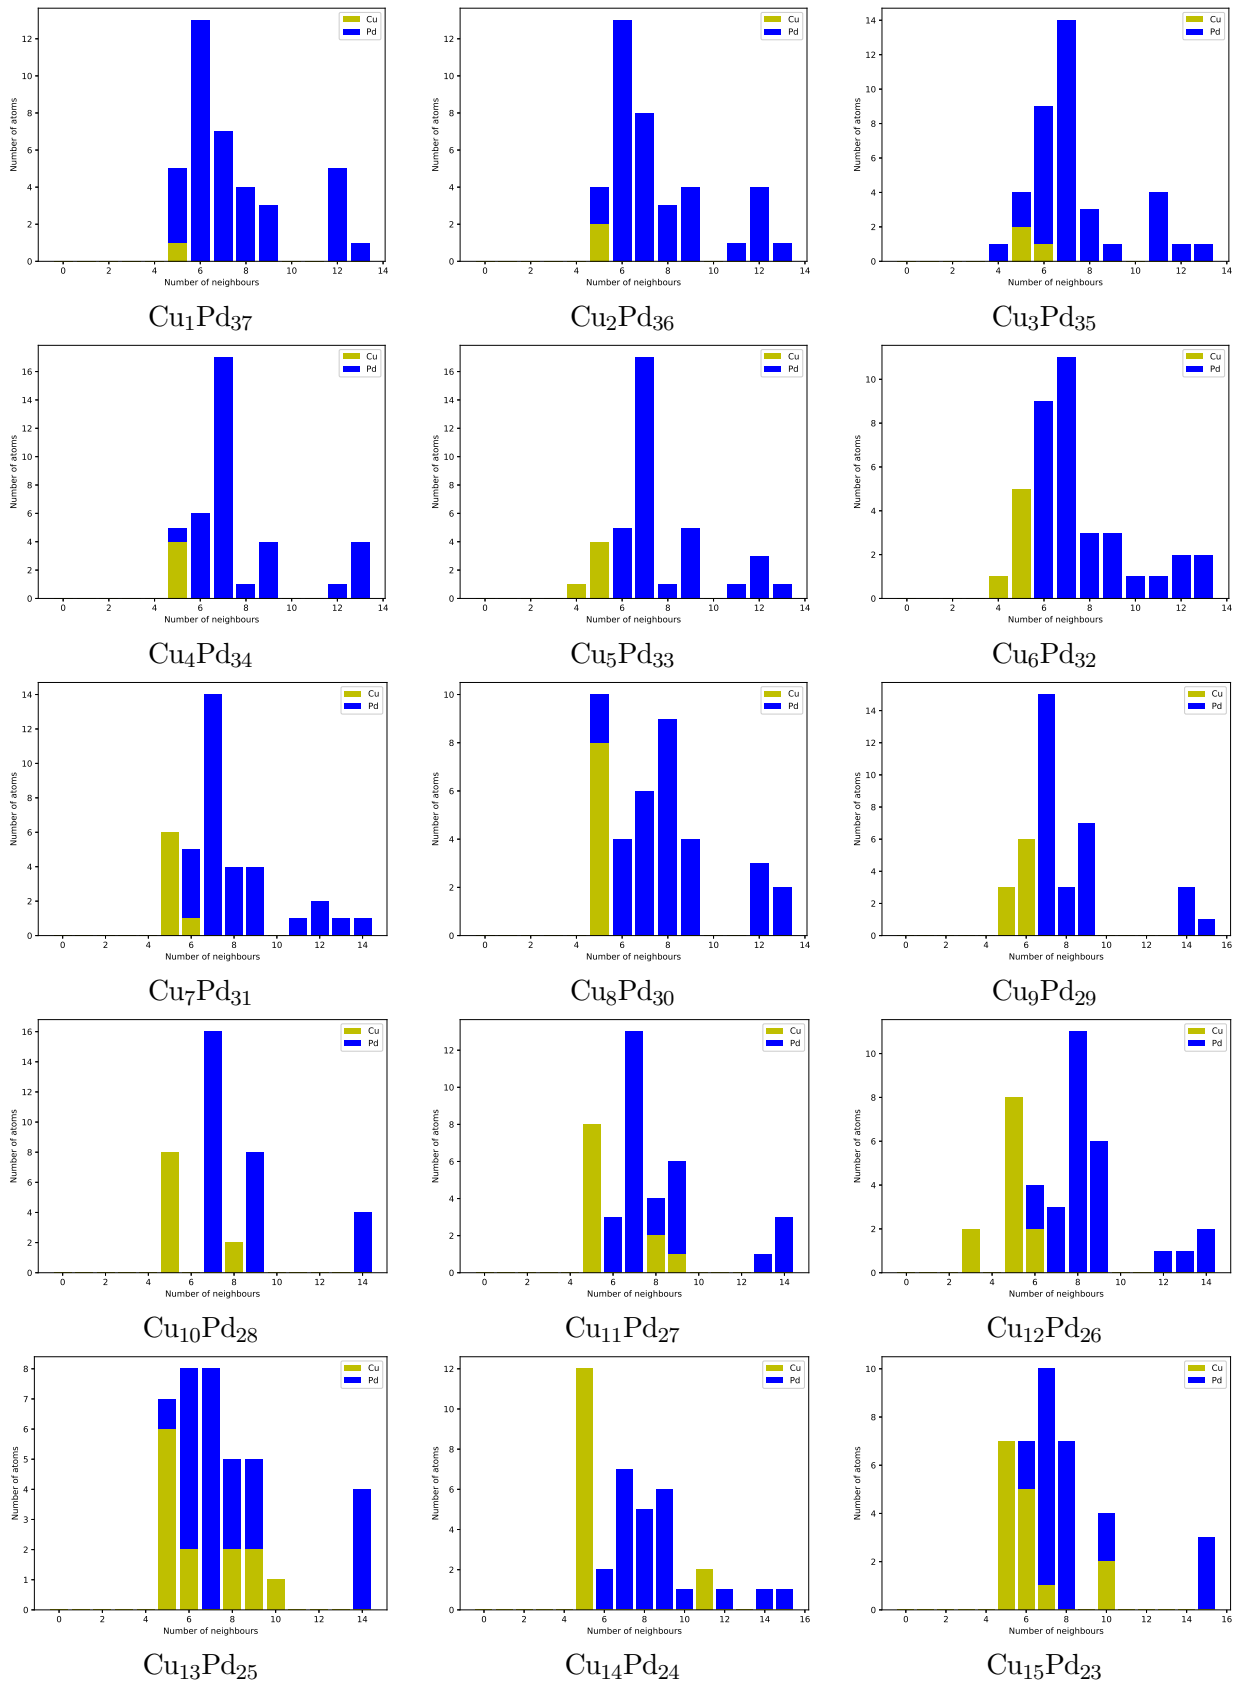

Figure 16: The nearest neighbour analyses calculated for GM clusters of all compositions found in a global optimisation run with GPS M.



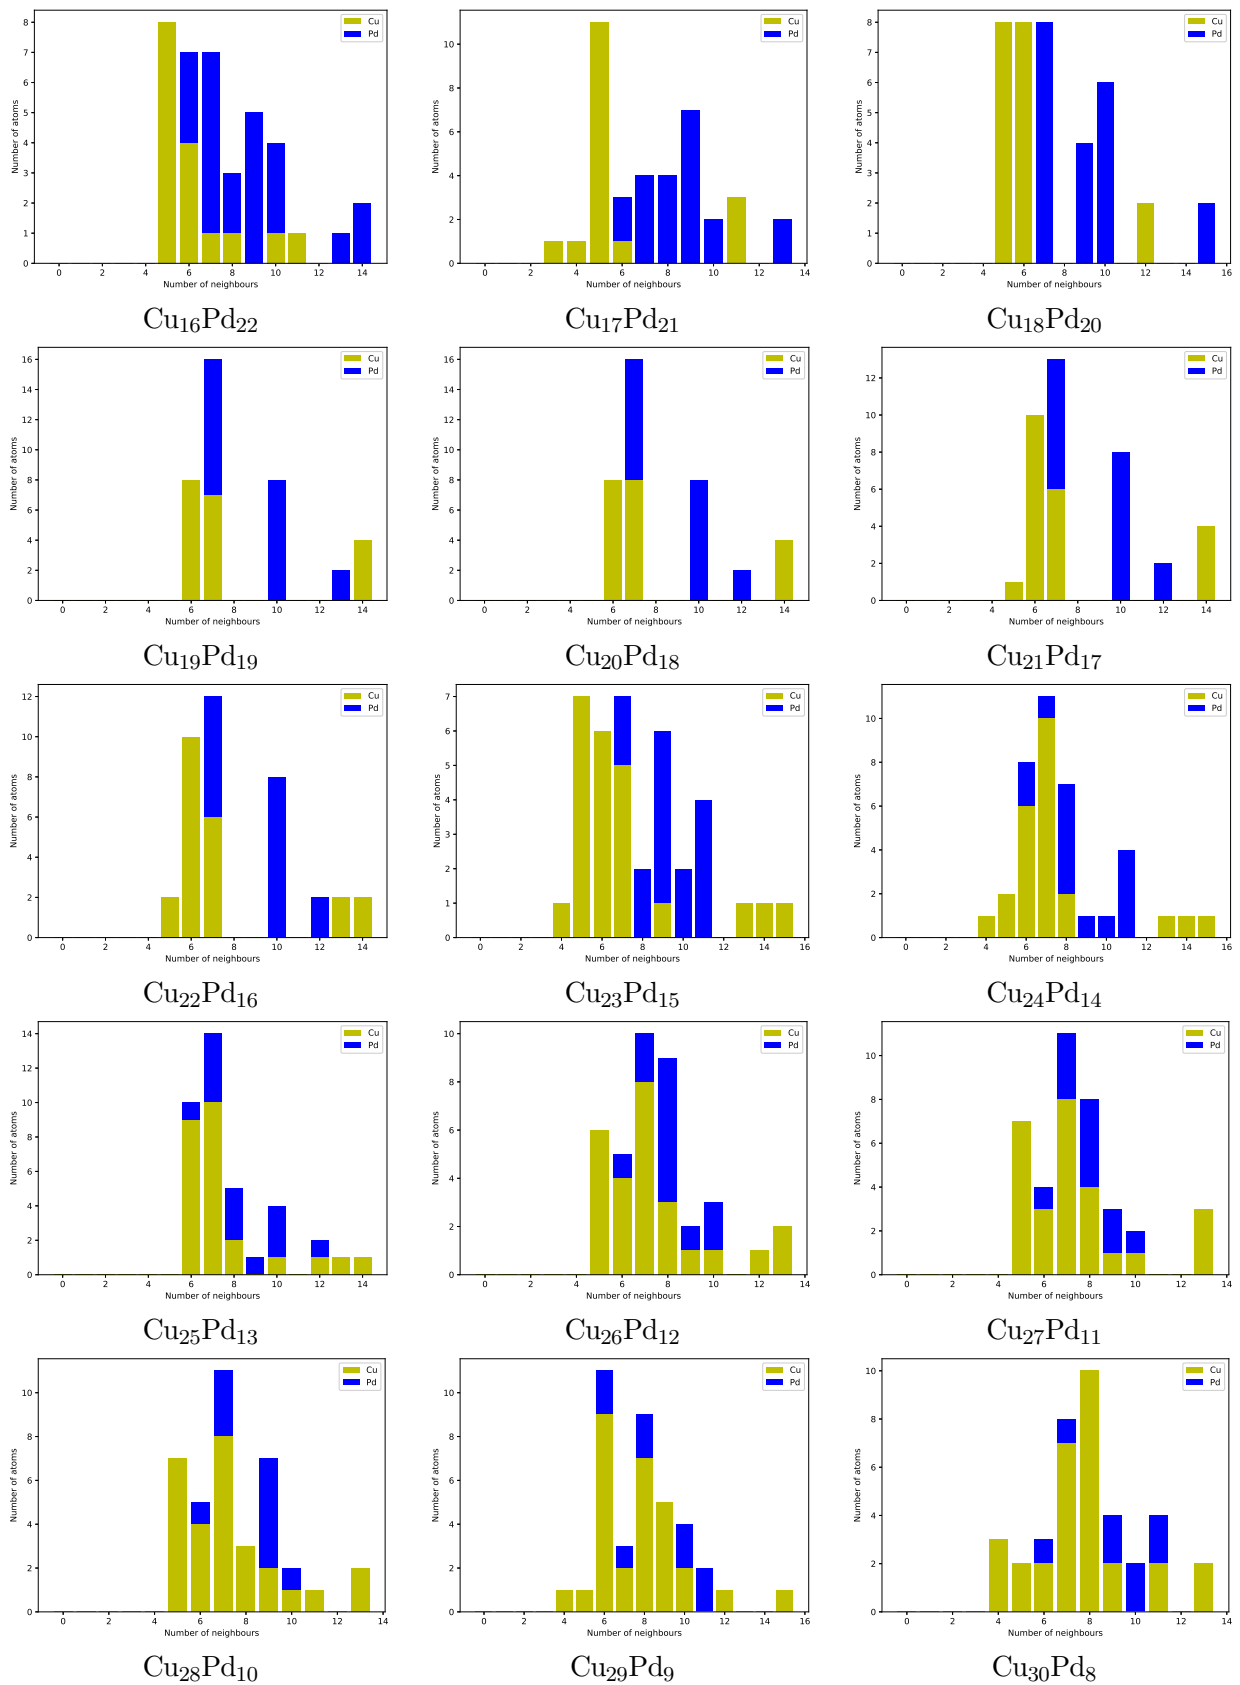

Figure 17: The nearest neighbour analyses calculated for GM clusters of all compositions found in a global optimisation run with GPS *M cont'd*.

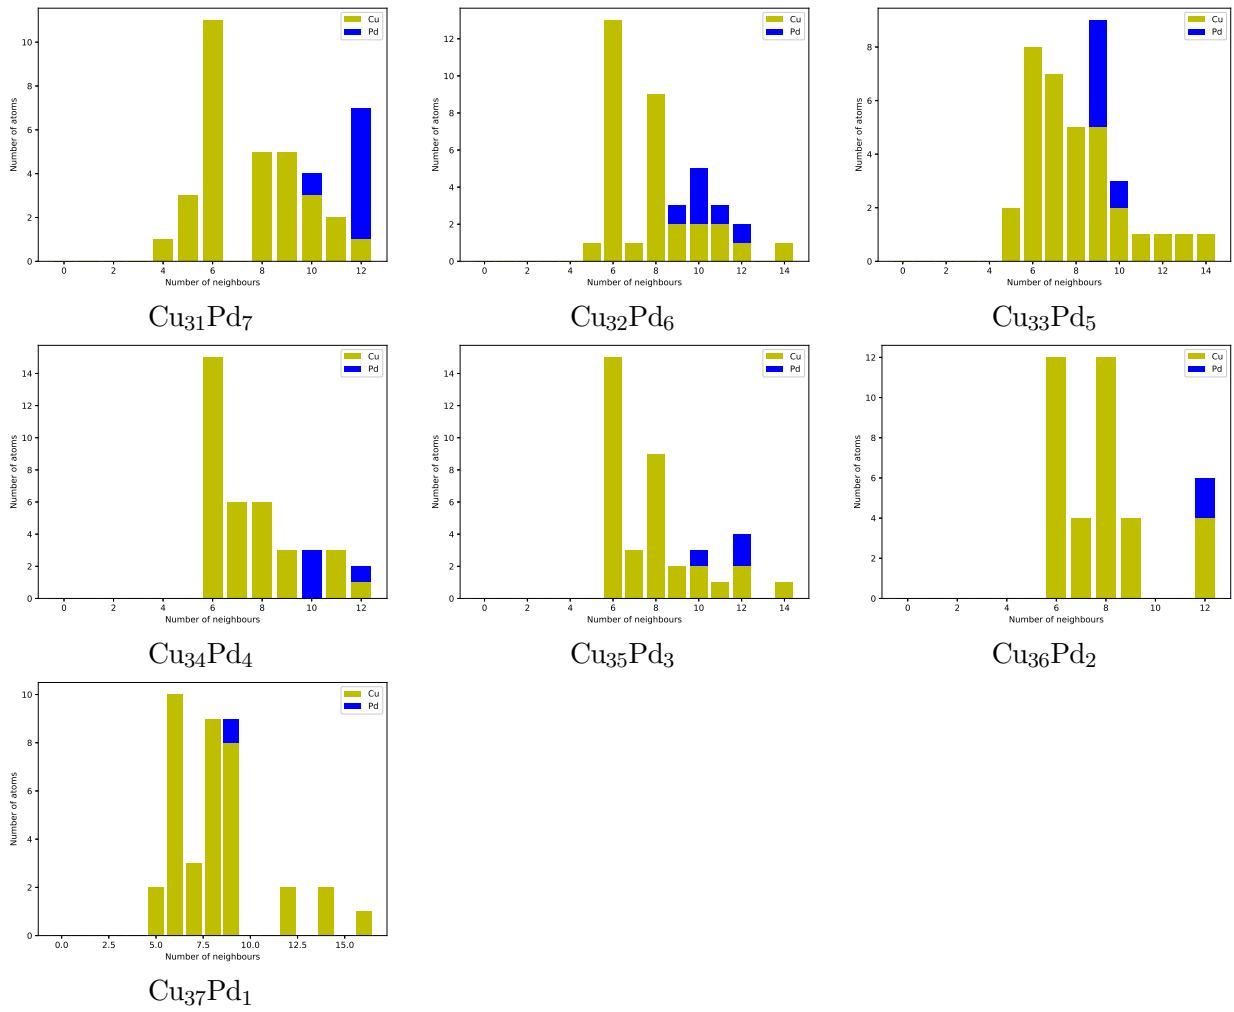

Figure 18: The nearest neighbour analyses calculated for GM clusters of all compositions found in a global optimisation run with GPS M *cont'd*.

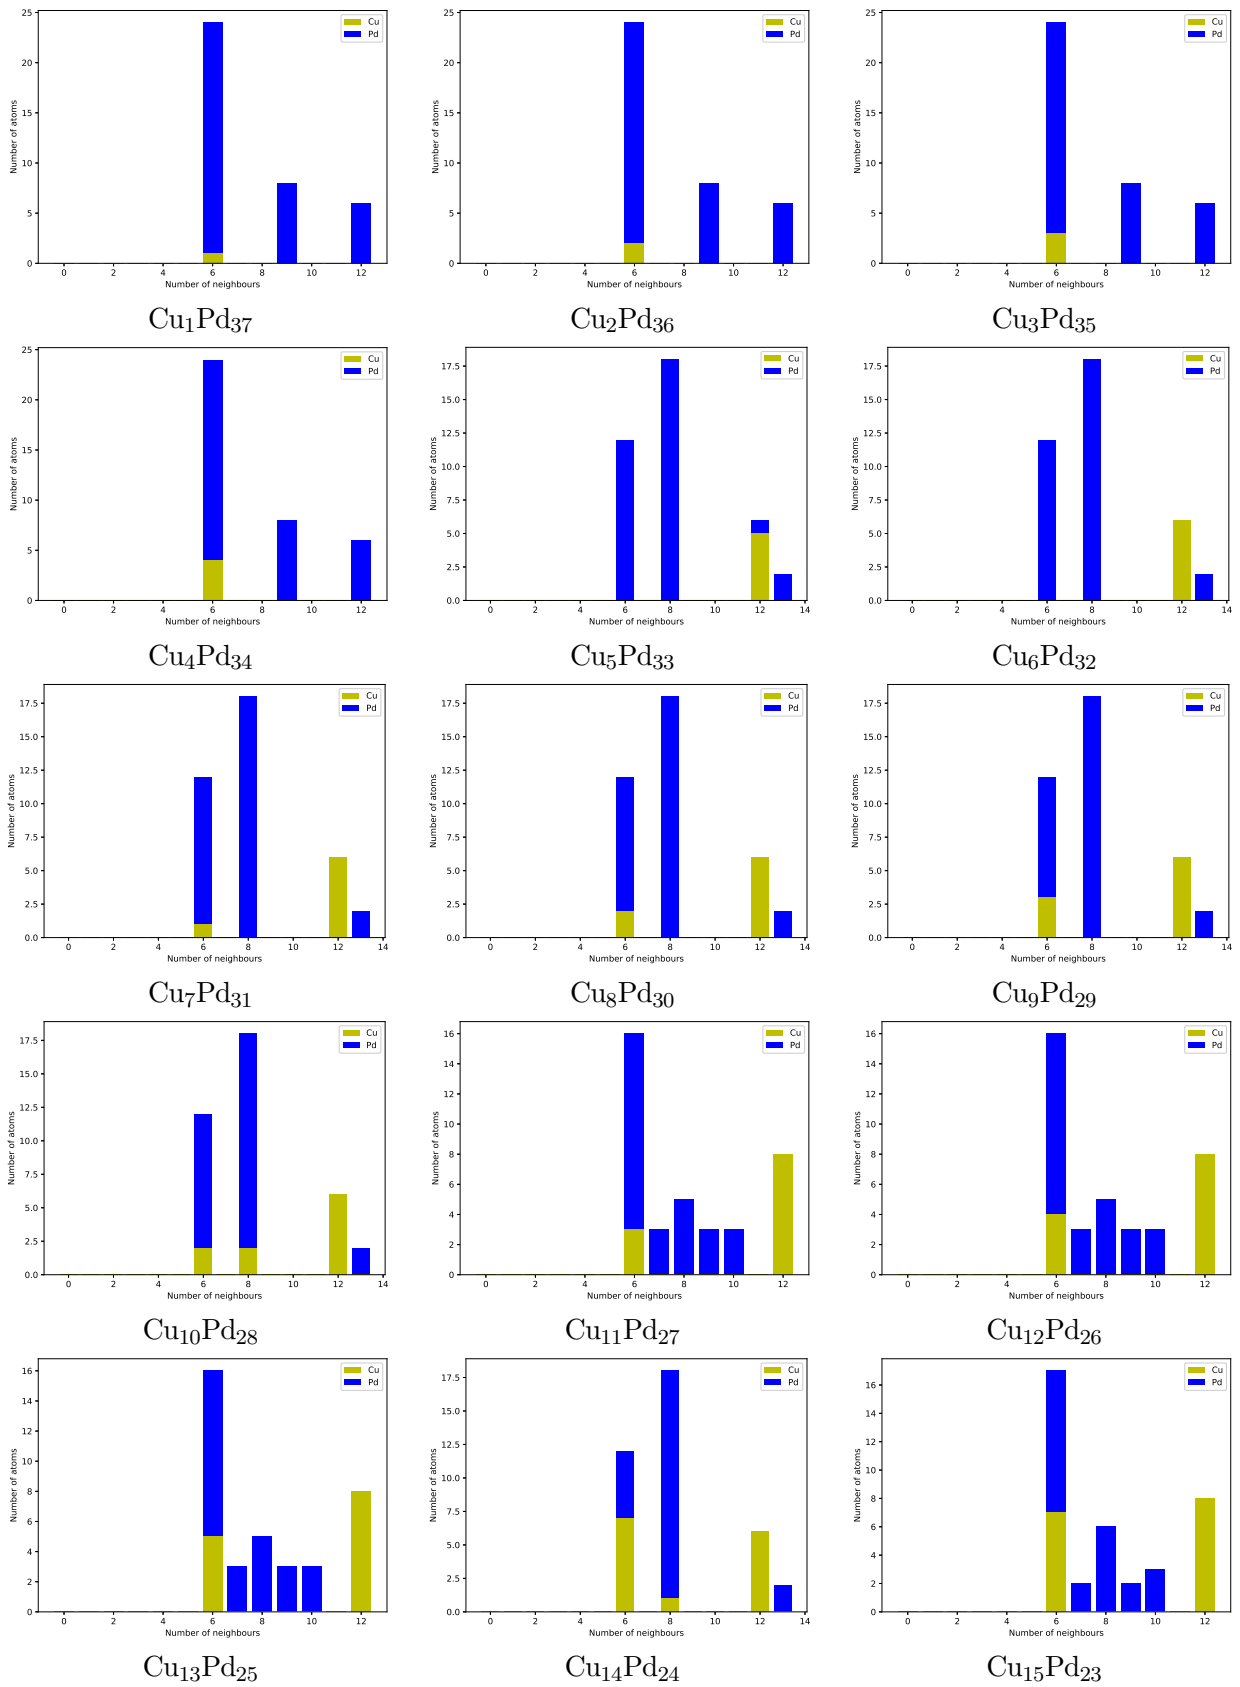

Figure 19: The nearest neighbour analyses calculated for GM clusters of all compositions found in a global optimisation run with GPS P/N.

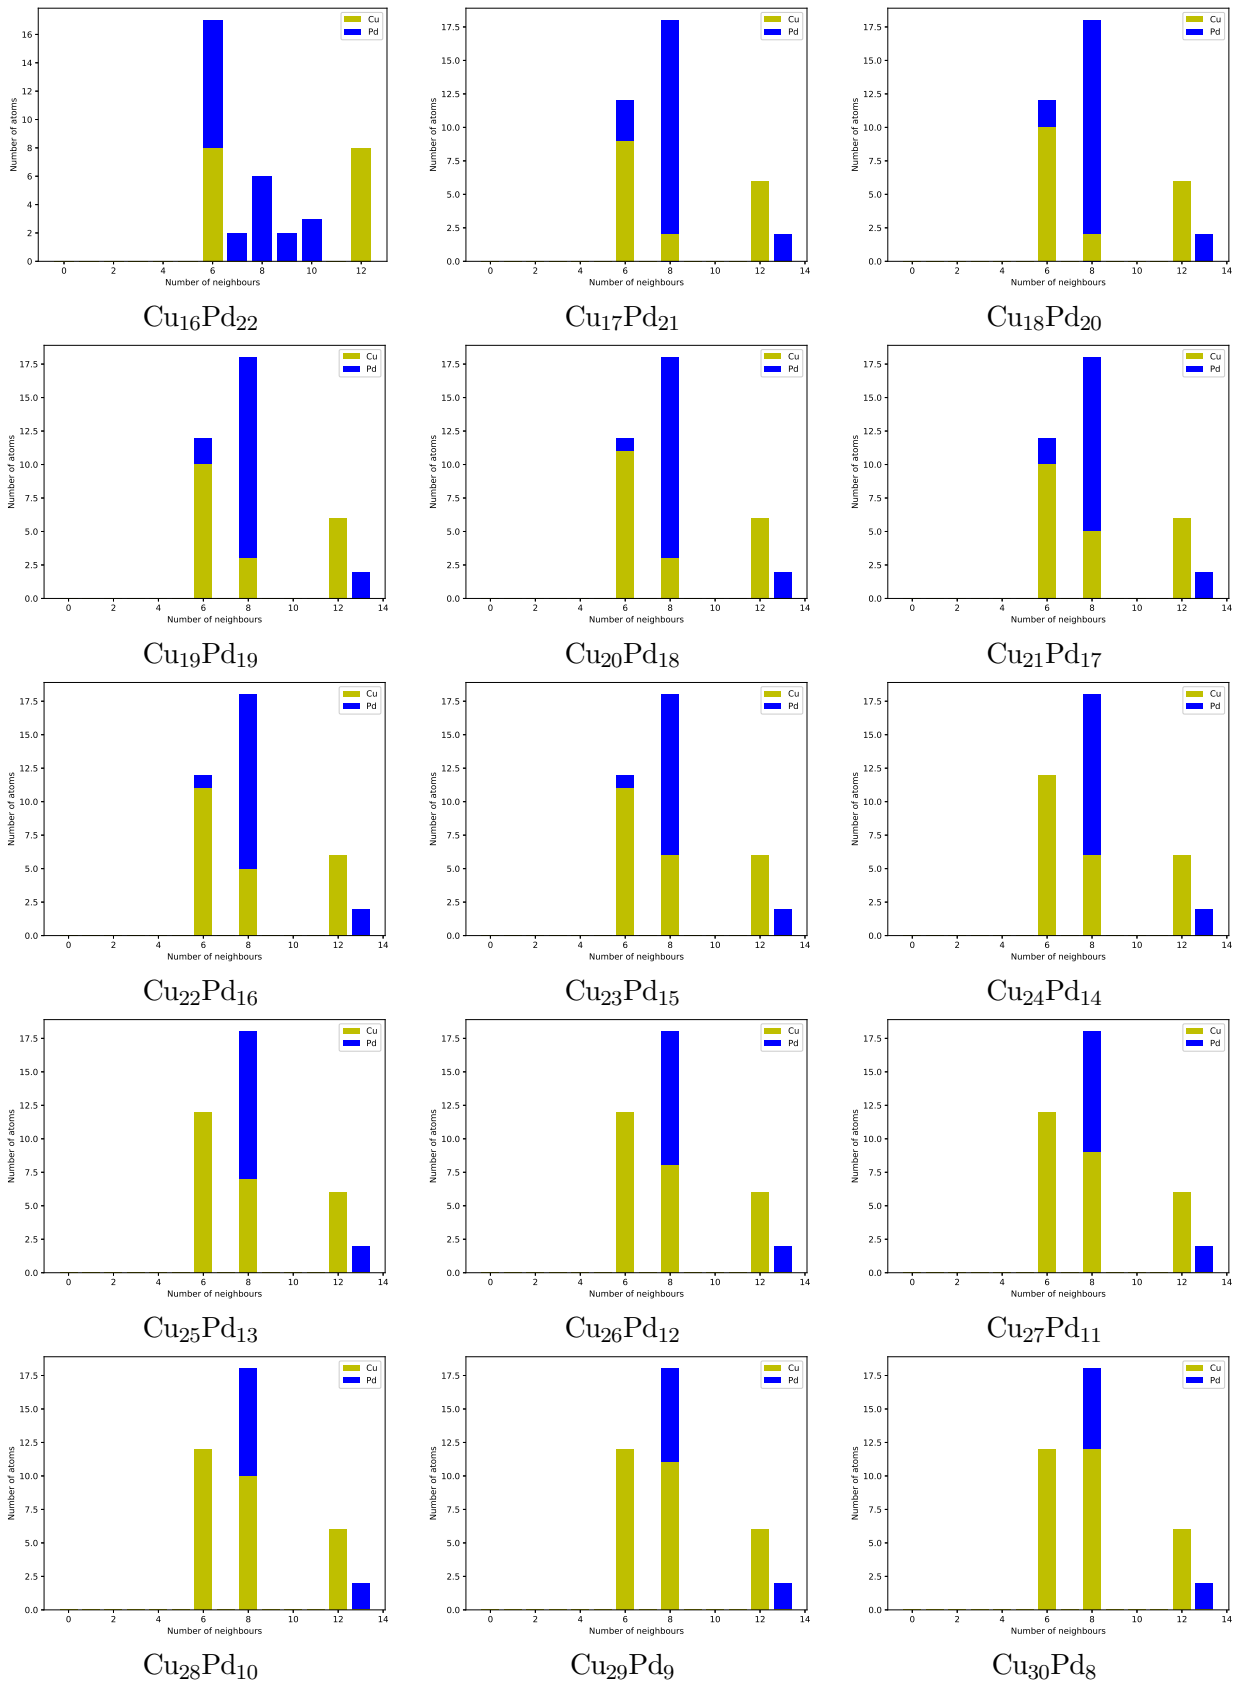

Figure 20: The nearest neighbour analyses calculated for GM clusters of all compositions found in a global optimisation run with GPS P/N *cont'd*.

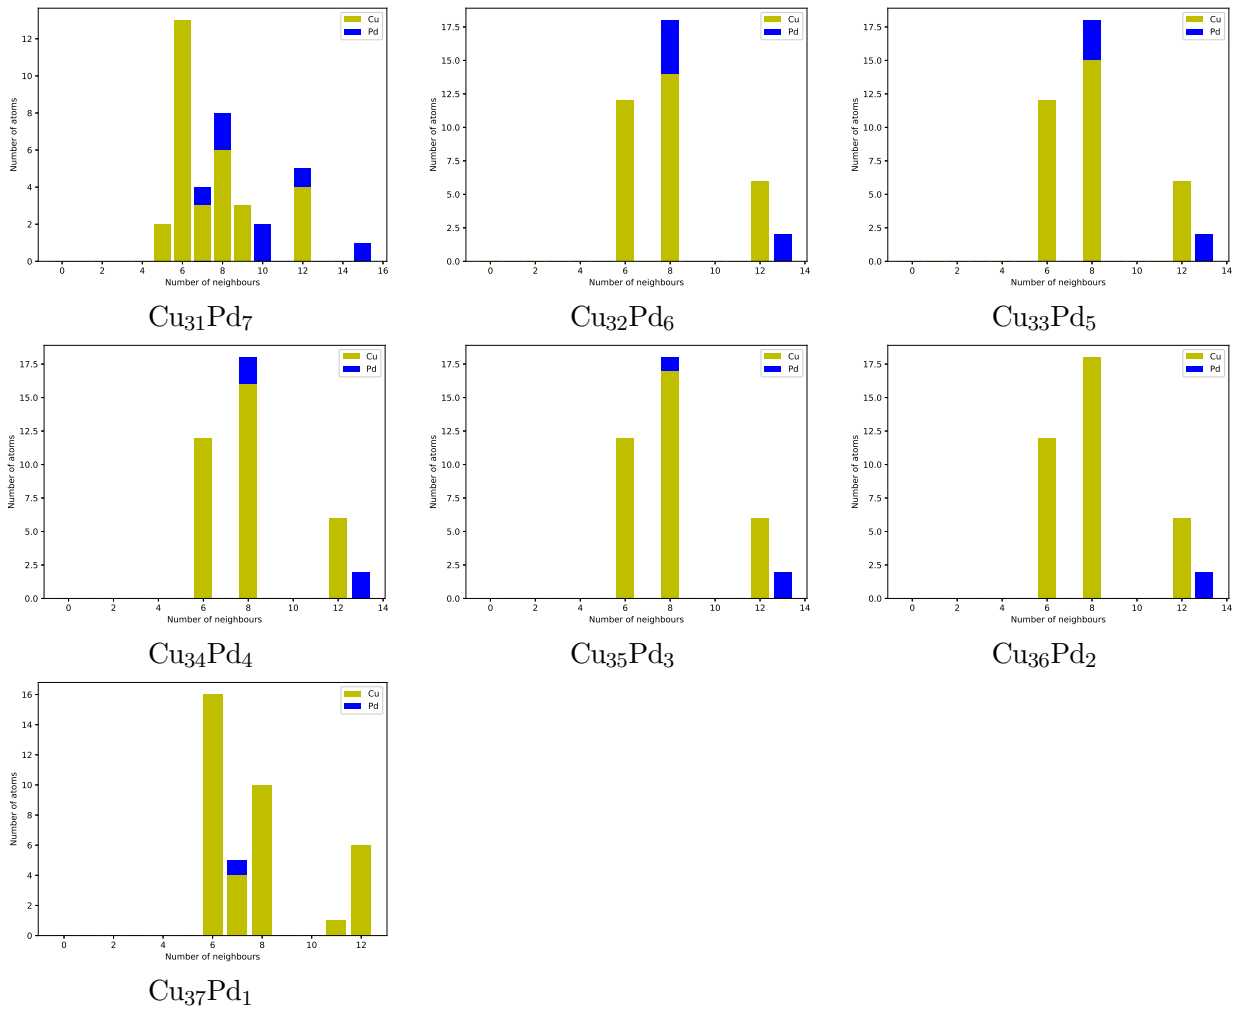

Figure 21: The nearest neighbour analyses calculated for GM clusters of all compositions found in a global optimisation run with GPS P/N *cont'd*.

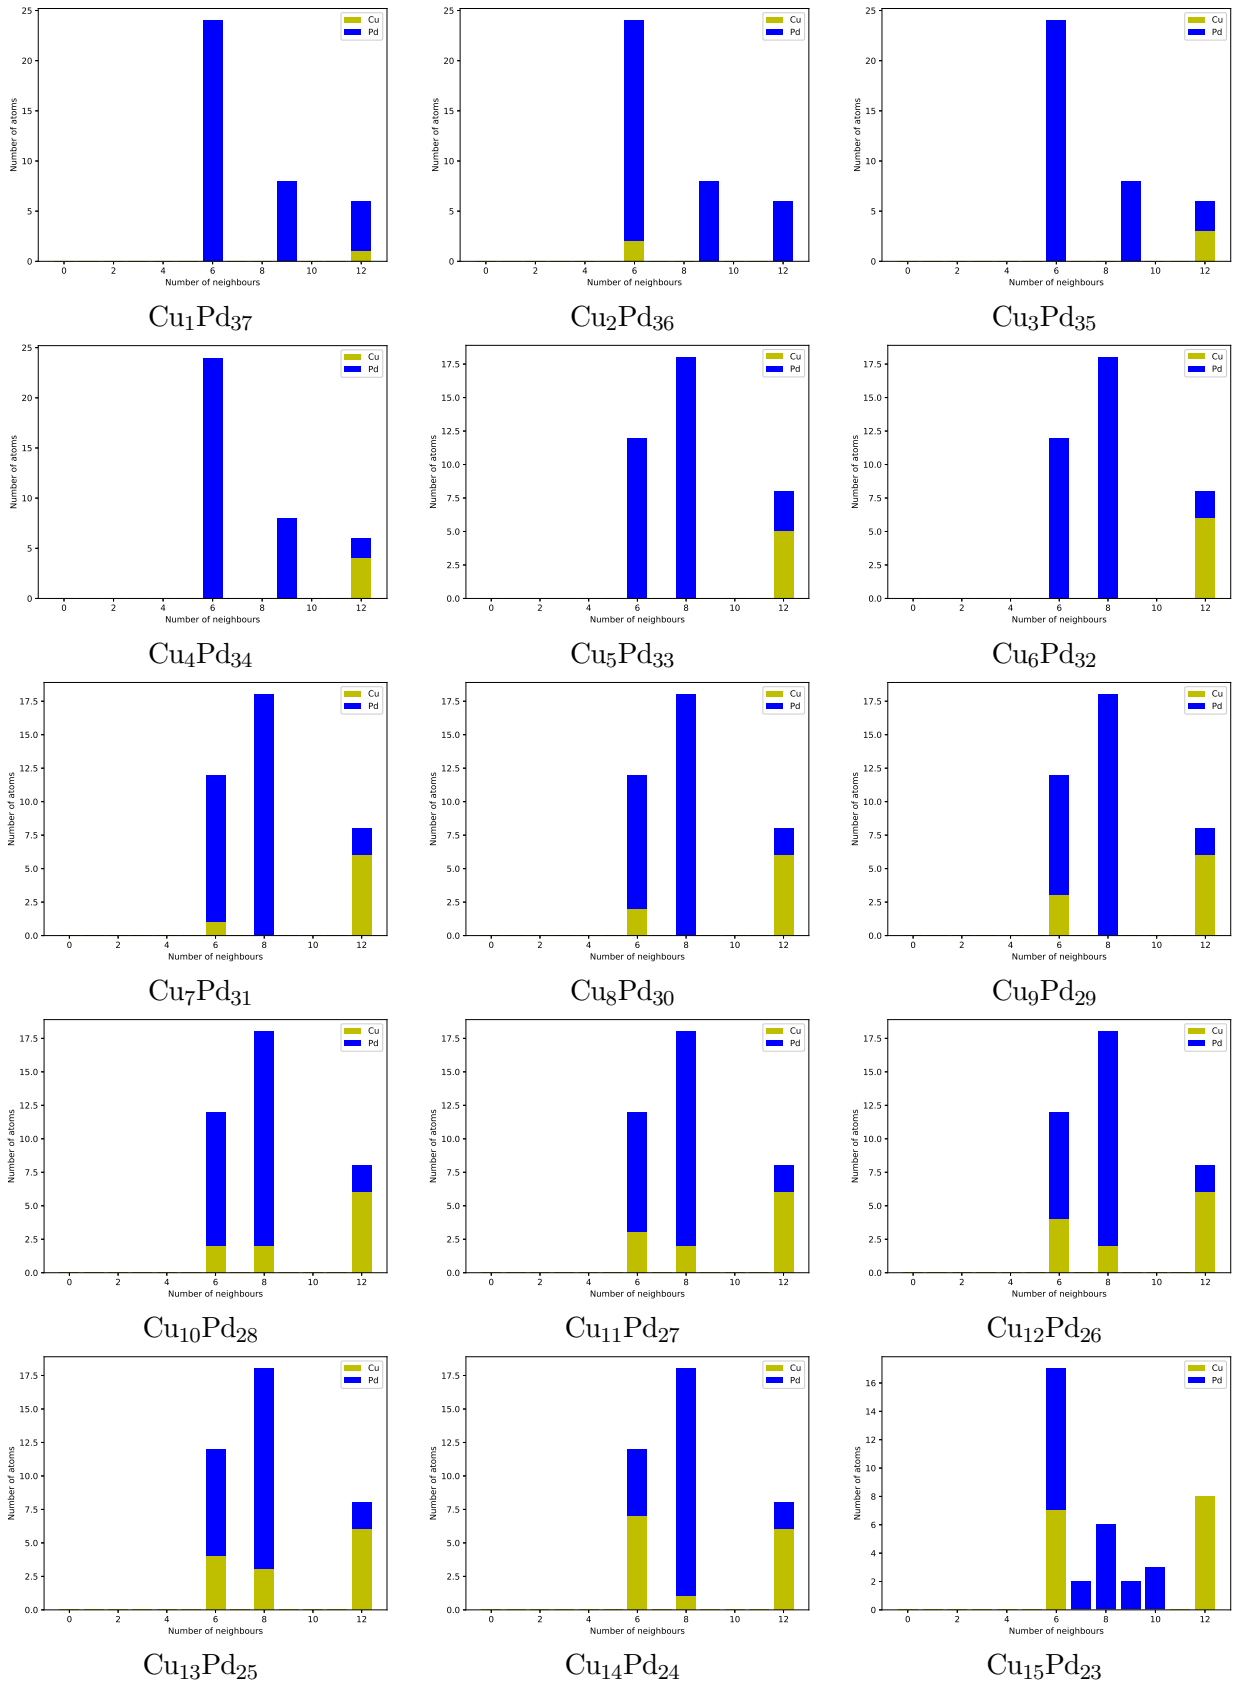

Figure 22: The nearest neighbour analyses calculated for GM clusters of all compositions as found by DFT refinement of the GM clusters from the global optimisation runs of each GPS.

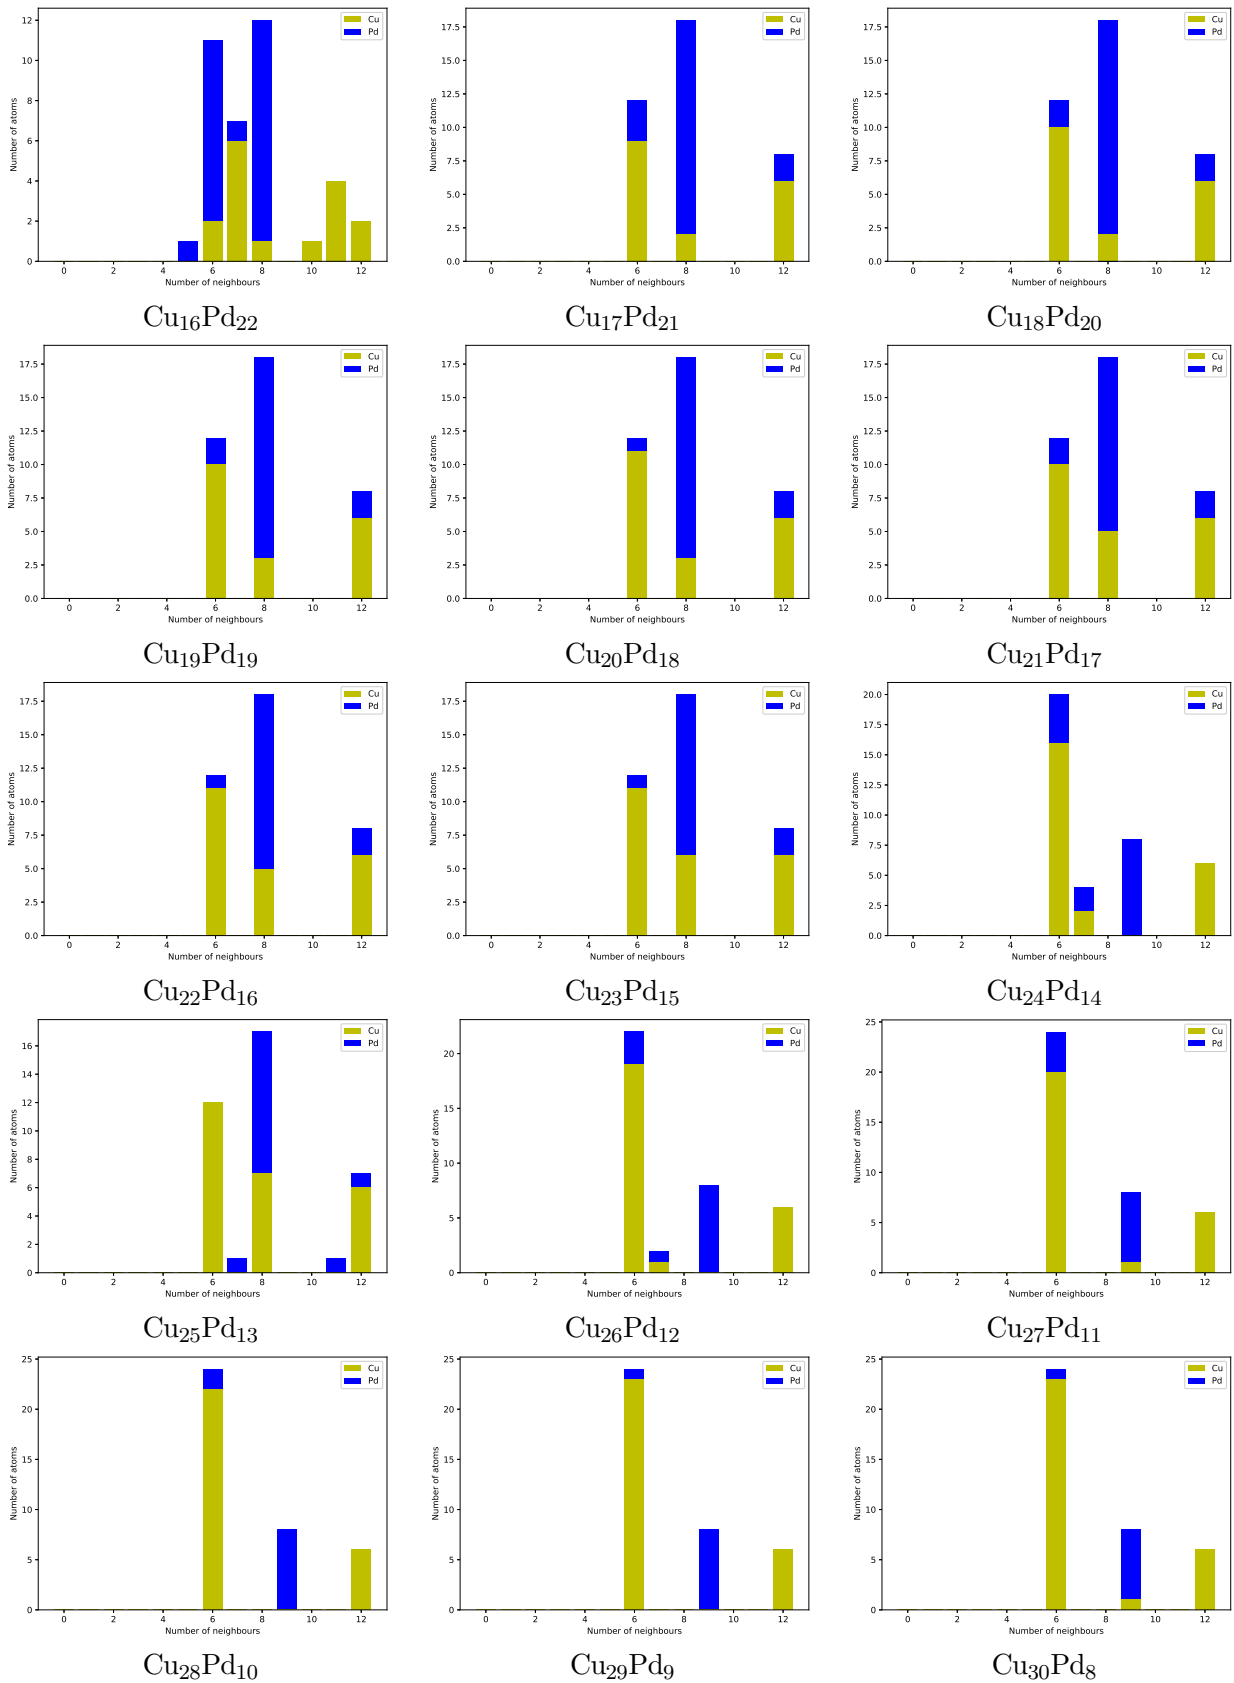

Figure 23: The nearest neighbour analyses calculated for GM clusters of all compositions as found by DFT refinement of the GM clusters from the global optimisation runs of each GPS *cont'd*.



Figure 24: The nearest neighbour analyses calculated for GM clusters of all compositions as found by DFT refinement of the GM clusters from the global optimisation runs of each GPS *cont'd*.



### 3 Radial distribution functions of clusters from select compositions, as calculated with GPSs C and P/N.

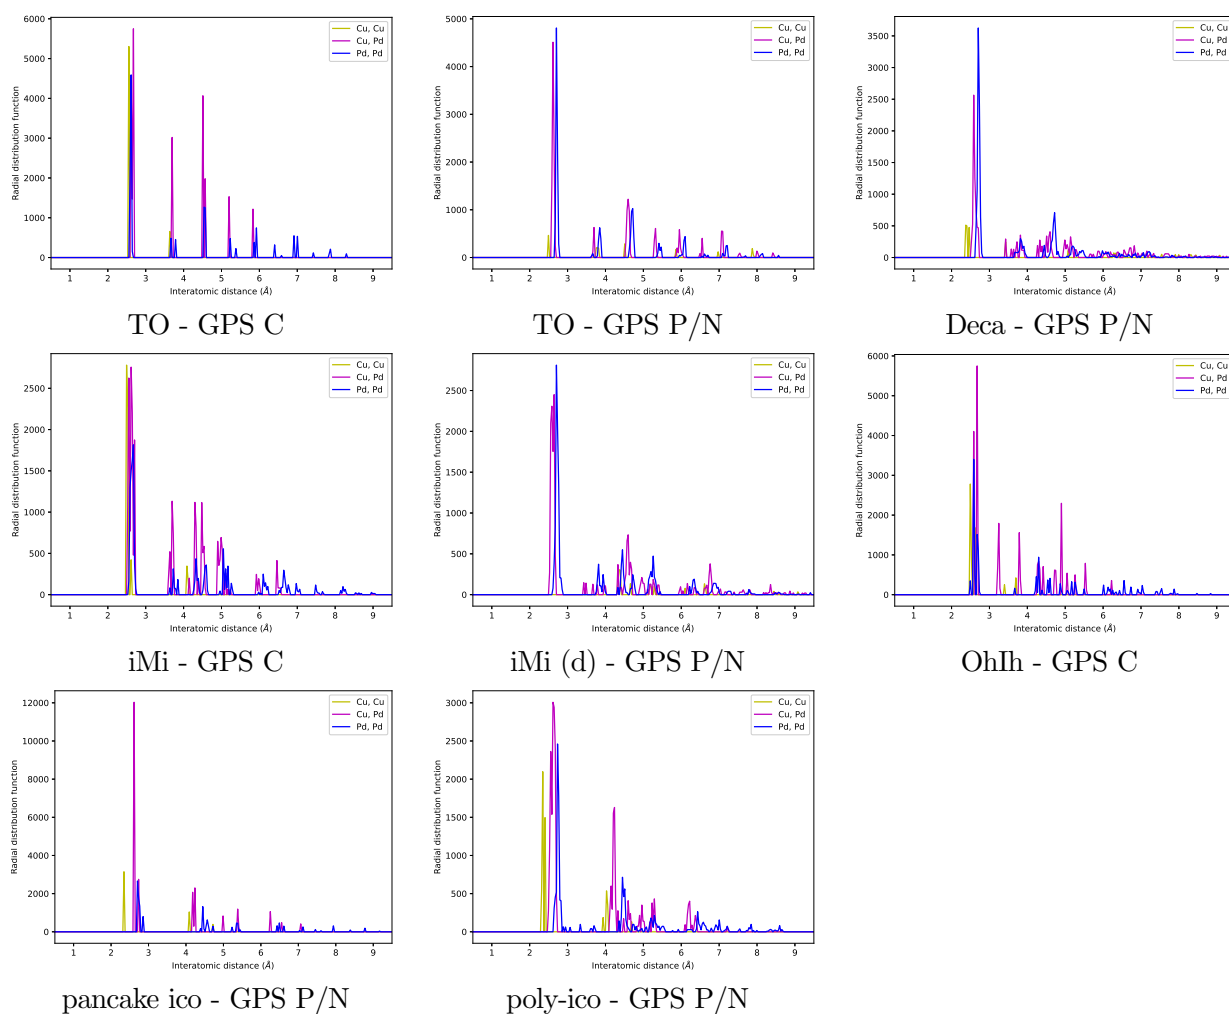

Figure 25: The radial distribution functions calculated for selected  $\text{Cu}_6\text{Pd}_{32}$  clusters. Labels indicate the structural motif of the cluster and the GPS it was found with.

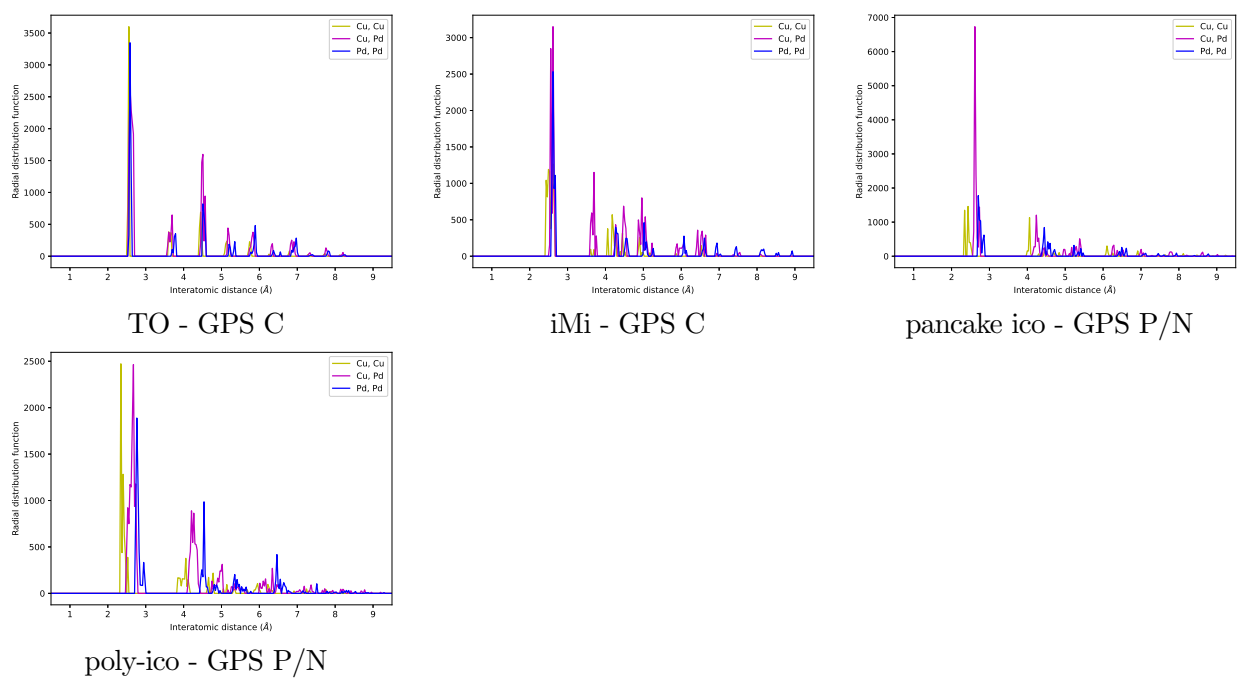

Figure 26: The radial distribution functions calculated for selected  $\text{Cu}_{14}\text{Pd}_{24}$  clusters. Labels indicate the structural motif of the cluster and the GPS it was found with.

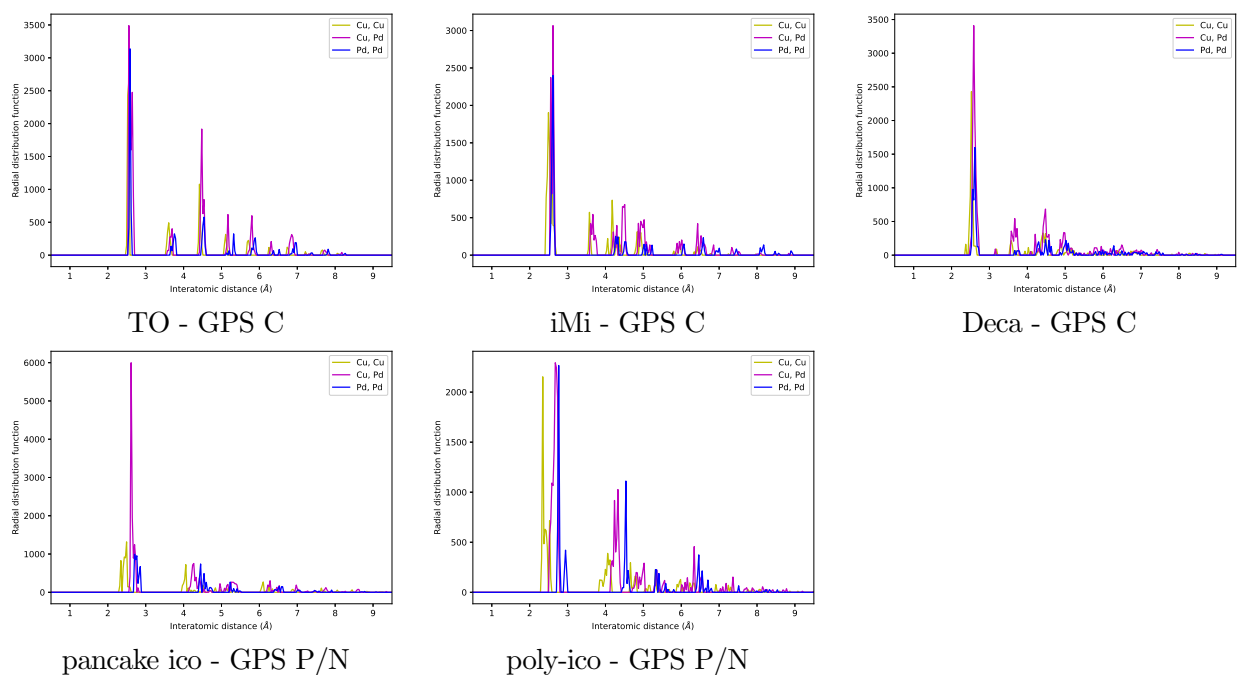

Figure 27: The radial distribution functions calculated for selected  $\text{Cu}_{19}\text{Pd}_{19}$  clusters. Labels indicate the structural motif of the cluster and the GPS it was found with.

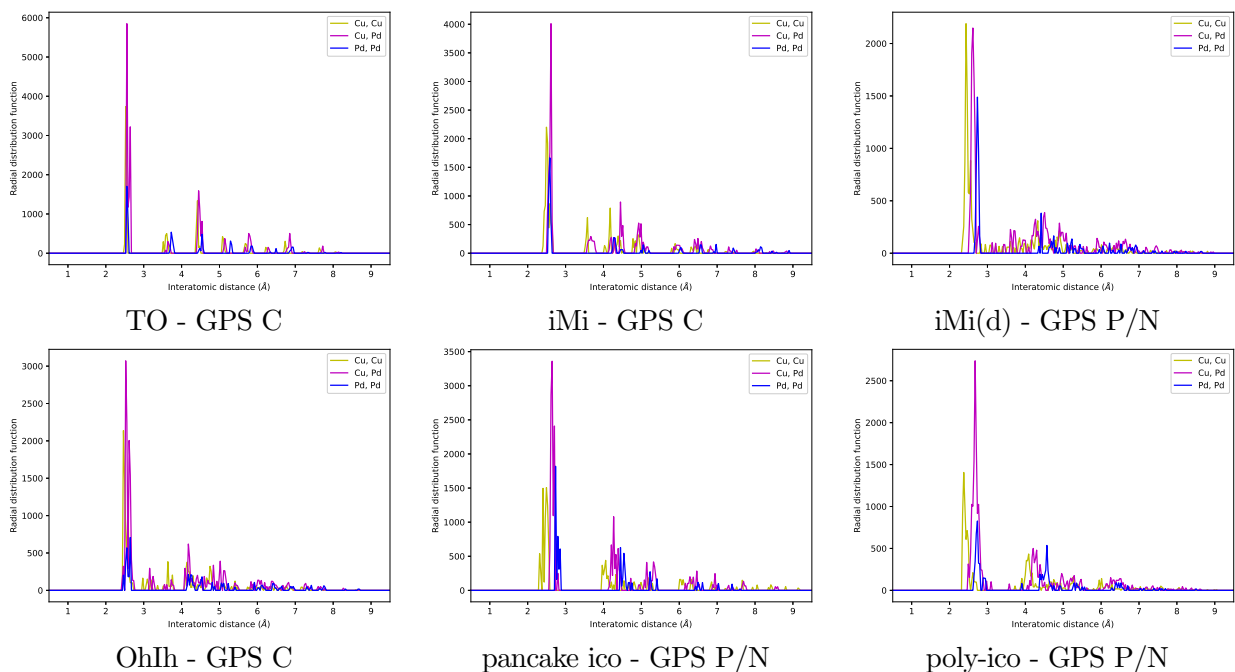

Figure 28: The radial distribution functions calculated for selected  $\text{Cu}_{24}\text{Pd}_{14}$  clusters. Labels indicate the structural motif of the cluster and the GPS it was found with.

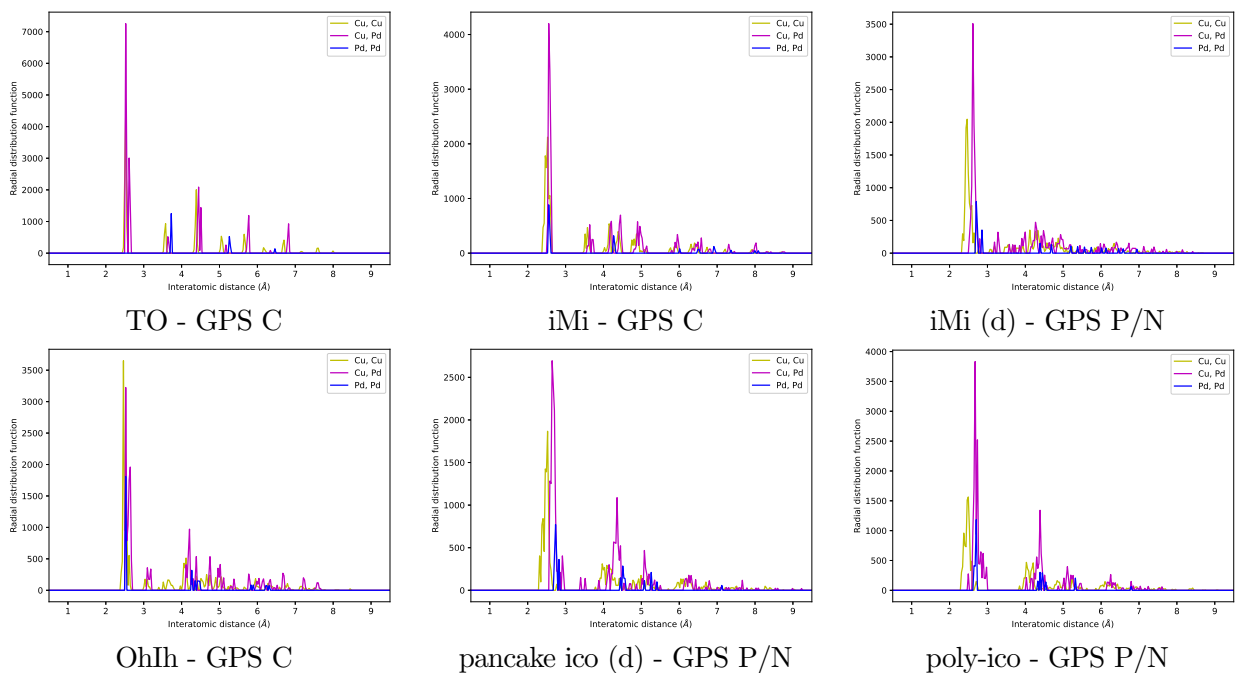

Figure 29: The radial distribution functions calculated for selected  $\text{Cu}_{32}\text{Pd}_6$  clusters. Labels indicate the structural motif of the cluster and the GPS it was found with.

4 Nearest neighbour analyses of clusters from select compositions, as calculated with GPSs C and P/N.

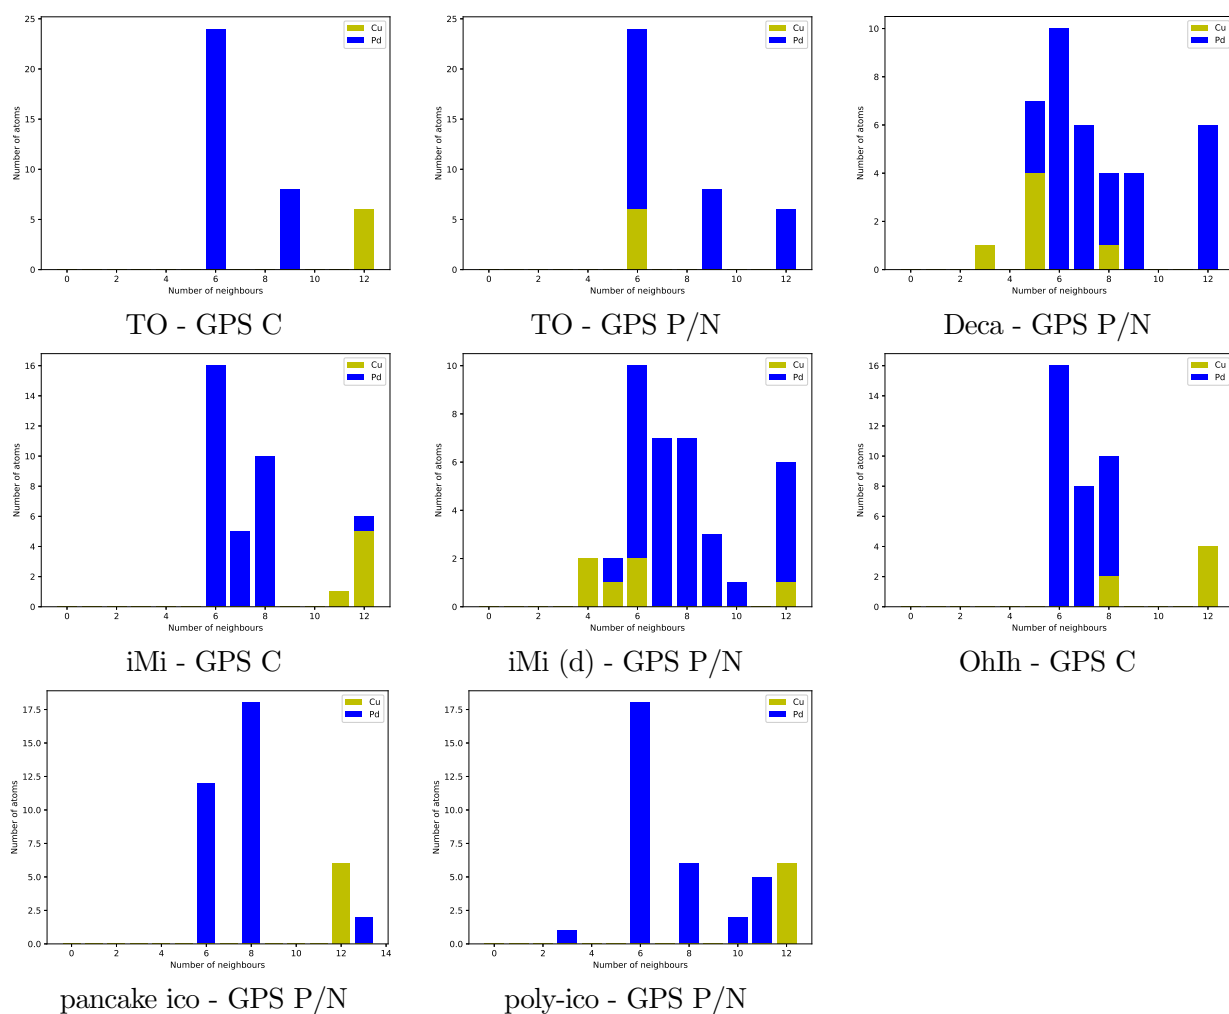

Figure 30: The nearest neighbour analyses for selected  $\text{Cu}_6\text{Pd}_{32}$  clusters. Labels indicate the structural motif of the cluster and the GPS it was found with.

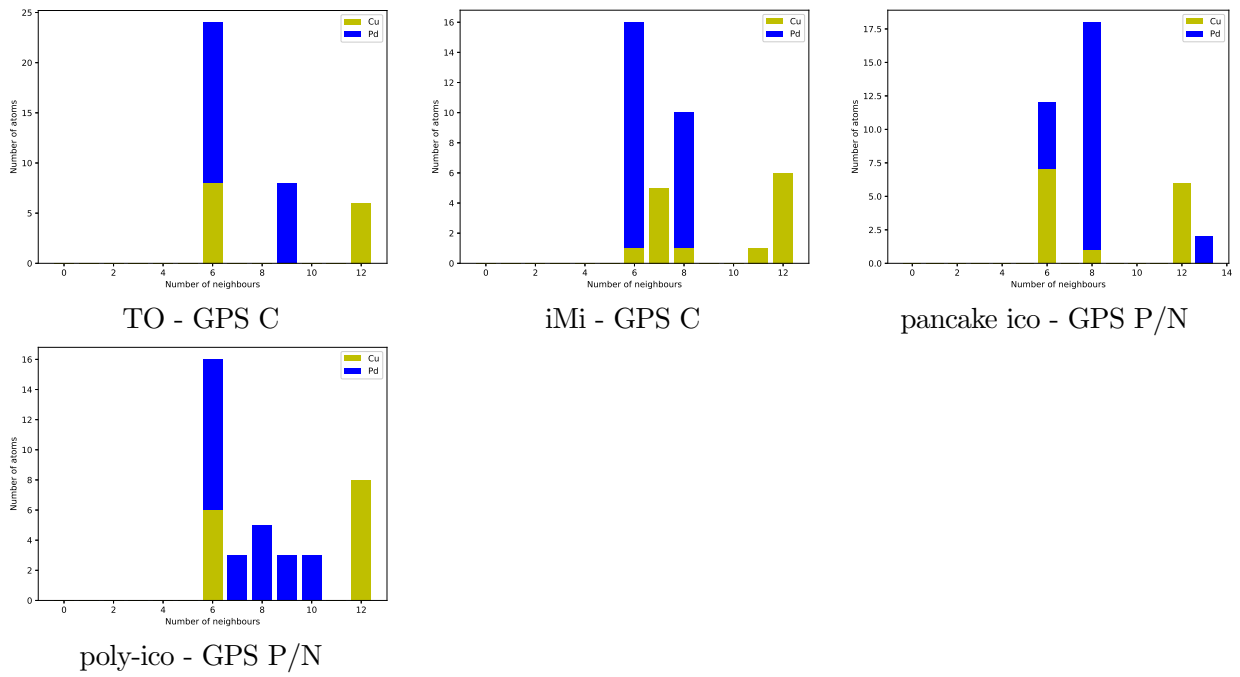

Figure 31: The nearest neighbour analyses for selected  $\text{Cu}_{14}\text{Pd}_{24}$  clusters. Labels indicate the structural motif of the cluster and the GPS it was found with.

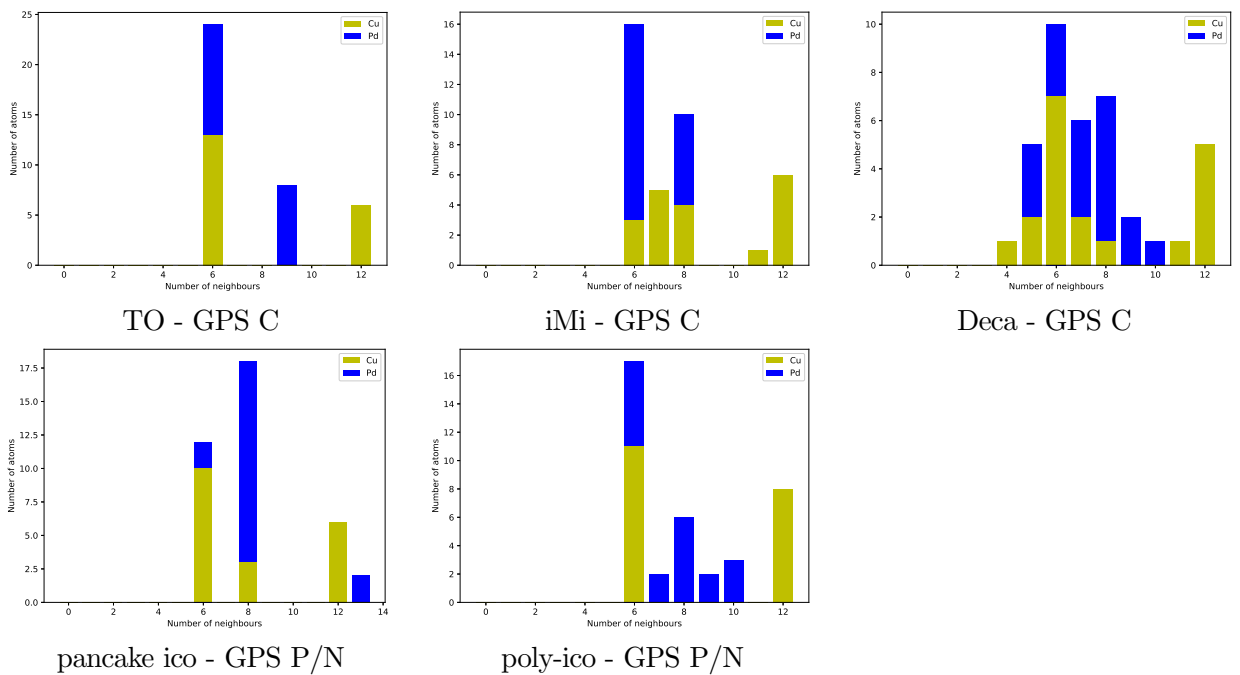

Figure 32: The nearest neighbour analyses for selected  $\text{Cu}_{19}\text{Pd}_{19}$  clusters. Labels indicate the structural motif of the cluster and the GPS it was found with.

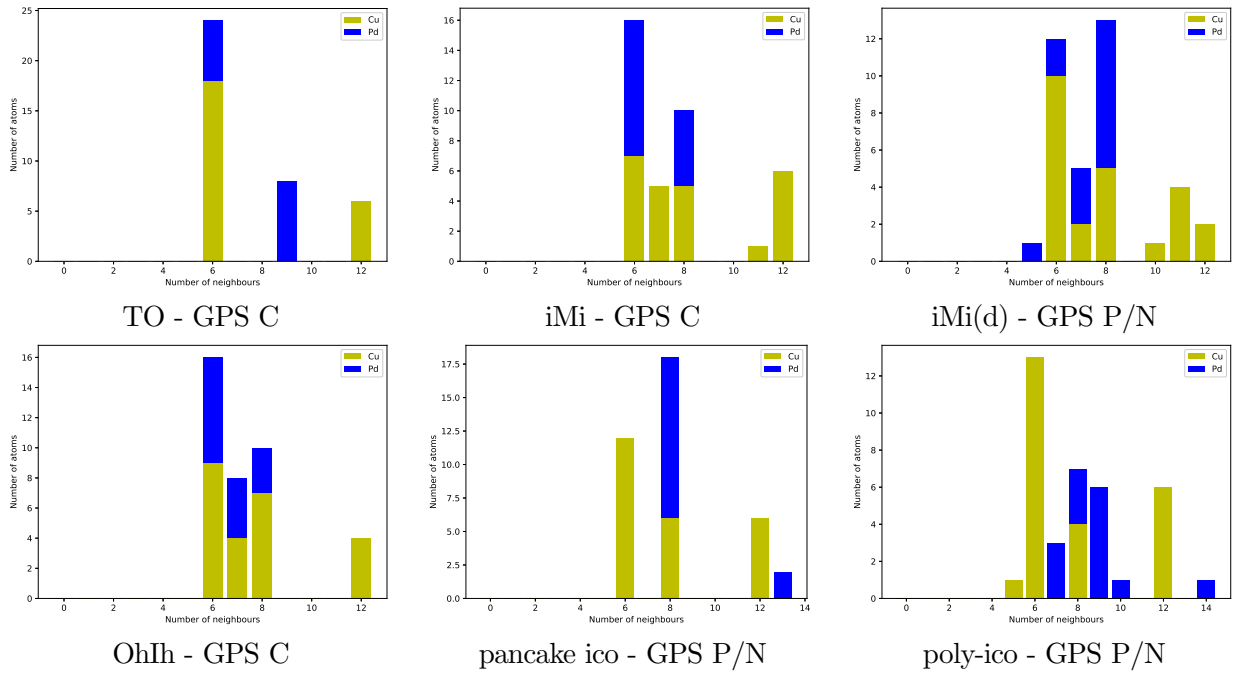

Figure 33: The nearest neighbour analyses for selected  $\text{Cu}_{24}\text{Pd}_{14}$  clusters. Labels indicate the structural motif of the cluster and the GPS it was found with.

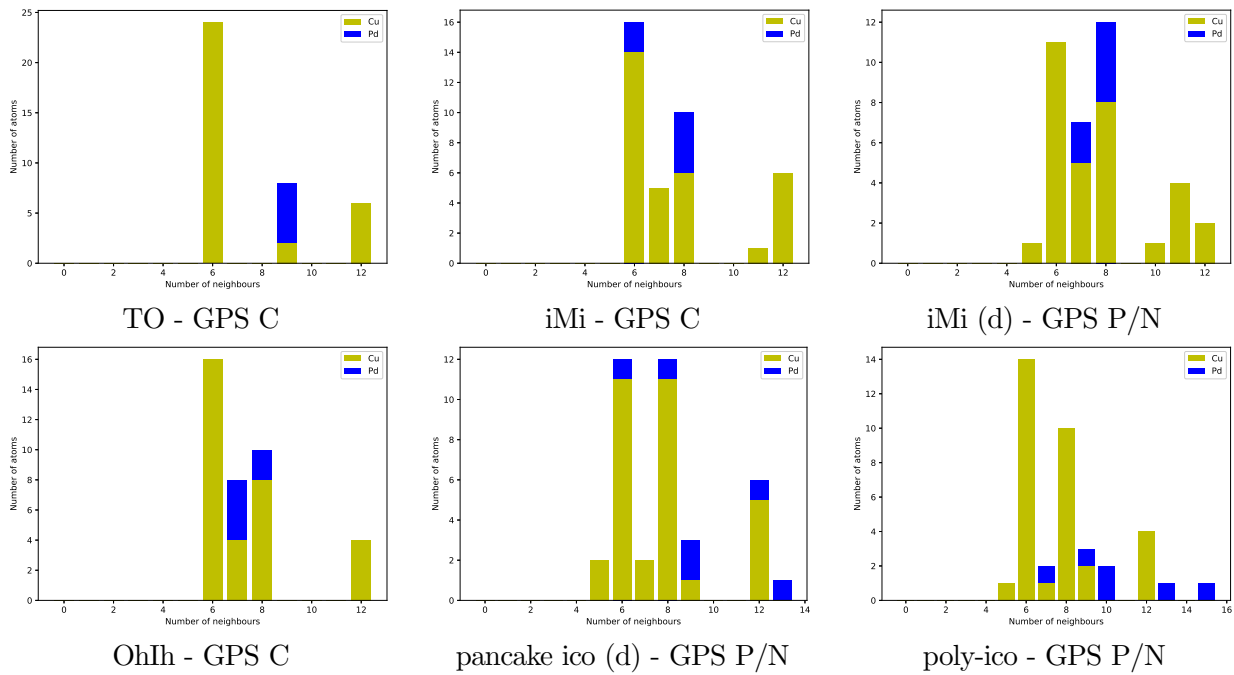

Figure 34: The nearest neighbour analyses for selected  $\text{Cu}_{32}\text{Pd}_6$  clusters. Labels indicate the structural motif of the cluster and the GPS it was found with.
